1 Electrocortigraphy is superior to subthalamic local field potentials for  
2 movement decoding in Parkinson's disease

3 Timon Merk<sup>1</sup>, Victoria Peterson<sup>2,5</sup>, Witold Lipski<sup>3</sup>, Benjamin Blankertz<sup>4</sup>, Robert S. Turner<sup>3</sup>, Ningfei Li<sup>1</sup>,  
4 Andreas Horn<sup>1</sup>, R. Mark Richardson<sup>2,5\*</sup>, Wolf-Julian Neumann<sup>1\*</sup>

5 <sup>1</sup>Movement Disorder and Neuromodulation Unit, Department of Neurology, Charité – Universitätsmedizin  
6 Berlin, Berlin, Berlin, 10117, Germany

7 <sup>2</sup>Brain Modulation Lab, Department of Neurosurgery, Massachusetts General Hospital, Boston,  
8 Massachusetts, 02114, USA

9 <sup>3</sup>Department of Neurobiology, University of Pittsburgh, Pittsburgh, Pennsylvania, 15213, USA

10 <sup>4</sup>Department of Computer Science, Technische Universität Berlin, Berlin, Berlin, 10587, Germany

11 <sup>5</sup>Harvard Medical School, Boston, Massachusetts, 02114, USA

12

13 \*These authors contributed equally to this work

14 Corresponding author and Lead contact: Wolf-Julian Neumann, MD, Assistant Professor for Interventional  
15 and Cognitive Neuromodulation, Movement Disorder and Neuromodulation Unit, Charité –  
16 Universitätsmedizin Berlin, Chariteplatz 1, 10117 Berlin, [julian.neumann@charite.de](mailto:julian.neumann@charite.de)

17

18 **Email:**

19 Timon Merk: [timon.merk@charite.de](mailto:timon.merk@charite.de)

20 Victoria Peterson: [vpeterson2@mgh.harvard.edu](mailto:vpeterson2@mgh.harvard.edu)

21 Witold Lipski: [lipskiw@upmc.edu](mailto:lipskiw@upmc.edu)

22 Benjamin Blankertz: [benjamin.blankertz@tu-berlin.de](mailto:benjamin.blankertz@tu-berlin.de)

23 Robert Sterling Turner: [rturner@pitt.edu](mailto:rturner@pitt.edu)

24 Ningfei Li: [Ningfei.li@charite.de](mailto:Ningfei.li@charite.de)

25 Andreas Horn: [andreas.horn@charite.de](mailto:andreas.horn@charite.de)

26 Robert Mark Richardson: [Mark.Richardson@mgh.harvard.edu](mailto:Mark.Richardson@mgh.harvard.edu)

27 Wolf-Julian Neumann: [julian.neumann@charite.de](mailto:julian.neumann@charite.de)

## 28 **Abstract**

29  
30 Brain signal decoding promises significant advances in the development of clinical brain computer interfaces  
31 (BCI). In Parkinson's disease (PD), first bidirectional BCI implants for adaptive deep brain stimulation (DBS)  
32 are now available. Brain signal decoding can extend the clinical utility of adaptive DBS but the impact of  
33 neural source, computational methods and PD pathophysiology on decoding performance are unknown.  
34 This represents an unmet need for the development of future neurotechnology. To address this, we  
35 developed an invasive brain-signal decoding approach based on intraoperative sensorimotor  
36 electrocorticography (ECoG) and subthalamic LFP to predict grip-force, a representative movement  
37 decoding application, in 11 PD patients undergoing DBS. We demonstrate that ECoG is superior to  
38 subthalamic LFP for accurate grip-force decoding. Gradient boosted decision trees (XGBOOST)  
39 outperformed other model architectures. ECoG based decoding performance negatively correlated with  
40 motor impairment, which could be attributed to subthalamic beta bursts in the motor preparation and  
41 movement period. This highlights the impact of PD pathophysiology on the neural capacity to encode  
42 movement kinematics. Finally, we developed a connectomic analysis that could predict grip-force decoding  
43 performance of individual ECoG channels across patients by using their connectomic fingerprints. Our study  
44 provides a neurophysiological and computational framework for invasive brain signal decoding to aid the  
45 development of an individualized precision-medicine approach to intelligent adaptive DBS.

46

## 47 **Keywords**

48 Parkinson's disease, Deep brain stimulation, Machine learning, Neuromodulation, Basal ganglia

49

## 50 **Significance Statement**

51 Neurotechnology will revolutionize the treatment of neurological and psychiatric patients, promising novel  
52 treatment avenues for previously intractable brain disorders. However, optimal surgical and computational  
53 approaches and their interactions with neurological disorders are unknown. How can recent advances in  
54 machine learning and connectomics aid the precision and performance of invasive brain signal decoding  
55 strategies? Do the brain disorders treated with such approaches have impact on decoding performance?  
56 We propose a real time compatible advanced machine learning pipeline for invasively recorded brain signals  
57 in Parkinson's disease (PD) patients. We report optimal movement decoding strategies with respect to  
58 signal source, model architecture and connectomic fingerprint and demonstrate that PD pathophysiology  
59 significantly and negatively impacts movement decoding. Our study has broad impacts for the development  
60 of smart brain implants for the treatment of PD and other brain disorders.

61

## 62 Introduction

63  
64 Subthalamic deep brain stimulation (DBS) for Parkinson's disease (PD) is one of the most successful  
65 neurotechnological advances in translational neuroscience to date. In addition to its clinical utility, DBS has  
66 provided unique insight into the neurophysiology of movement disorders (Cagnan *et al.*, 2019; Krauss *et*  
67 *al.*, 2021). PD has been associated with increased beta synchronization and beta bursts in the basal ganglia  
68 (Kühn *et al.*, 2006; Neumann *et al.*, 2016; Kehnemouyi *et al.*, 2021) and exaggerated phase amplitude  
69 coupling and waveform sharpness asymmetry in cortex (de Hemptinne *et al.*, 2015; Cole *et al.*, 2017).  
70 Symptom severity in the OFF medication state was shown to correlate with resting beta power in the STN  
71 across patients (Kühn *et al.*, 2006; Neumann *et al.*, 2016). Such observations have inspired the idea of  
72 adaptive DBS (aDBS), where electrophysiological signals are used to change stimulation parameters in  
73 response to evolving clinical states (Little *et al.*, 2013; Beudel and Brown, 2016; Tinkhauser *et al.*, 2017;  
74 Swann *et al.*, 2018; Piña-Fuentes, van Dijk and M, 2019; Velisar *et al.*, 2019; Hwang *et al.*, 2020; Petrucci  
75 *et al.*, 2020). In a series of seminal papers it was shown that significant clinical benefit and reduced side-  
76 effects could be achieved, when stimulation was triggered by beta power (Little *et al.*, 2013; Velisar *et al.*,  
77 2019). Machine-learning for aDBS applications can integrate multivariate feature sets for adaptive DBS  
78 control beyond beta power. First trials on machine learning based movement classification to trigger  
79 adaptive DBS either using electrocorticography (ECoG) or subcortical local field potentials (LFP) in essential  
80 tremor have shown promising results (Opri *et al.*, 2020; He *et al.*, 2021). In the future, smart implants may  
81 become available that combine invasive brain signal decoding with real time stimulation adaptation, towards  
82 a precision medicine approach to adaptive DBS in PD and other brain disorders. However, the identification  
83 of optimal decoding strategies and the characterization of relevant factors with impact on decoding  
84 performance remains an unmet need. With the present study, we address this by a thorough investigation  
85 of grip-force decoding that is motivated by the well described relationship of vigor, movement velocity,  
86 bradykinesia and dopamine in Parkinson's disease (Turner and Desmurget, 2010; Yttri and Dudman, 2016;  
87 Lofredi *et al.*, 2018). We use state-of-art machine learning algorithms with multimodal invasive  
88 neurophysiology and whole-brain connectomics in PD patients undergoing DBS electrode implantation. Our  
89 results highlight the utility of cortical vs. subcortical signals to accurately decode grip-force and establish a  
90 link between decoding performance and motor impairment in PD. Finally, we investigate brain networks  
91 from ECoG recording locations with normative structural and functional connectomics and demonstrate the  
92 predictive power of connectomic fingerprints for brain signal decoding.

## 93 Results

### 94 Real-time processing & Feature Definition

95  
96 We analyzed sensorimotor ECoG and subthalamic LFP data recorded intraoperatively from 11 PD patients  
97 undergoing DBS implantation during performance of a Go/No-Go based cued grip-force task (Figure 1A).  
98 Individual electrode localizations in Montreal Neurological institute (MNI) space are shown in Figure 1B with  
99  
100

101 typical responses (Kühn *et al.*, 2004; Androulidakis *et al.*, 2007; Kondylis *et al.*, 2016; Lofredi *et al.*, 2018)  
 102 in Figure 1C aligned to onset of grip force (total n=2685, on average n=244 ± 149 STD movements per  
 103 patient, see Figure 1-figure supplement 1 for more detail on grip-force variability). For the use in machine  
 104 learning models, band power feature time-series were extracted in a real-time BCI compatible  
 105 implementation (Figure 1D) streamed in virtual packets of 100 ms length at a sampling rate of 1000 Hz to  
 106 mimic the online application. Variance as a measure of amplitude of rereferenced, band-pass filtered raw  
 107 data segments was extracted at 10 Hz with an adaptive window length from 1000 – 100 ms of past data for  
 108 eight oscillatory features [ $\theta$  (4-8 Hz),  $\alpha$  (8-12 Hz),  $\beta$  (13-35 Hz), low  $\beta$  (13-20 Hz), high  $\beta$  (20-35 Hz), low  $\gamma$   
 109 (60-80 Hz), high frequency activity (HFA) (90-200 Hz) and all  $\gamma$  (60-200 Hz)]. All features were normalized  
 110 to the median of the past 10 seconds to compensate for potential signal changes over time. The target  
 111 variable was continuously measured grip-force (z-scored for each recording session), which was cleaned  
 112 from noise and baseline drift (Xie, Schwartz and Prasad, 2018).  
 113

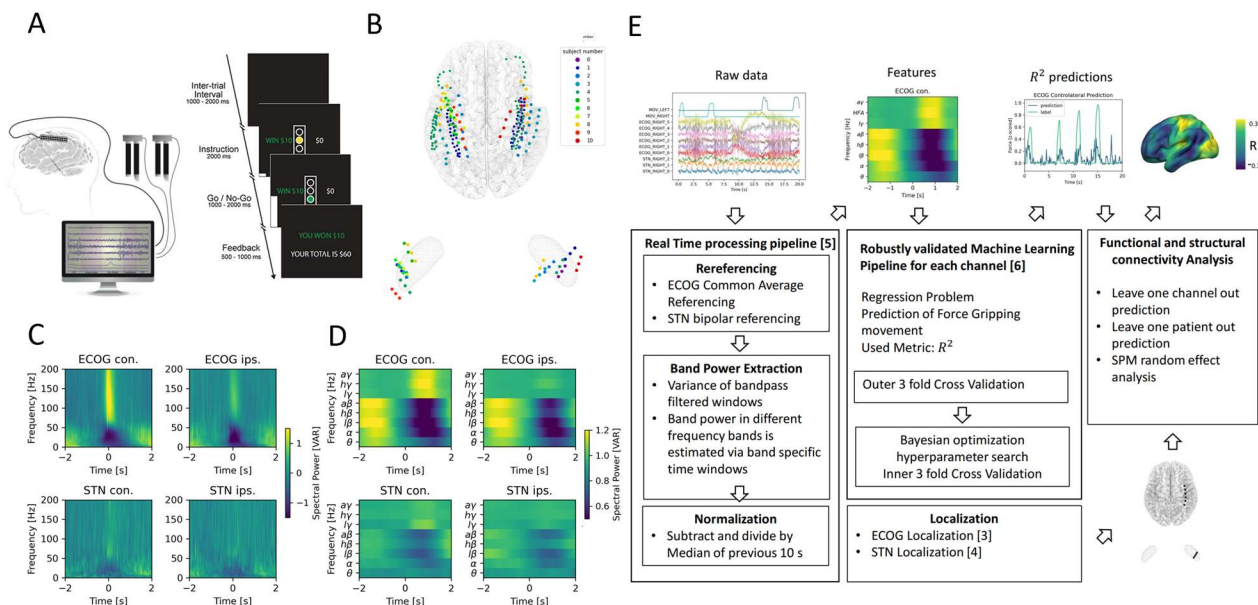

114  
 115  
 116 **Figure 1: Movement induced spectral changes are more dominant for ECoG than STN-LFP signals**  
 117 **for a grip force task before and after a machine learning feature signal processing pipeline.**  
 118 (A) ECoG, STN and gripping force were recorded simultaneously during performance of a Go / No-Go task.  
 119 (B) Individual ECoG and STN electrodes were localized and transformed into in Montreal Neurological  
 120 Institute (MNI) space. Note that ECoG strip designs varied slightly between patients (see Supplementary  
 121 File 1a), leading to varying dimensions of overall input feature matrices. The number of ECoG channels  
 122 (average n= 9.45 ± 11.15 STD per hemisphere) is higher compared to the number of STN LFP channels  
 123 (n=3). (C) Mean spectral power of all ECoG and STN channels for contra- and ipsilateral movements  
 124 showed typical movement induced spectral changes. (D) Virtual streaming of data packets secured real-  
 125 time compatible processing and normalization to extract time-frequency modulations into discrete feature  
 126 time-series. Mean features of all ECoG and STN channels are visualized. (E) Schematic flow chart of the  
 127 implemented real-time enabled feature extraction, machine learning evaluation and functional and structural  
 128 connectivity analysis pipeline.

129 **Including preceding signals up to 500 ms before the decoded sample improves**  
 130 **grip-force decoding performance**

131  
 132 A linear model analysis of all eight oscillatory features per channel was used to investigate the contributing  
 133 band power correlations for time-points simultaneous to and preceding target samples of continuous grip-  
 134 force measurements. Figure 2A shows the weight distributions of multivariable linear models of the best  
 135 performing channels per subject. Since each cortical or STN electrode has multiple channels, only the best  
 136 channel per electrode is selected for this visualization. As the interpretability of coefficients in multivariable  
 137 models is limited (Haufe *et al.*, 2014) we have further visualized the normalized coefficients of univariate  
 138 models for each relative time-point and frequency band in Figure 2B. Next, to investigate the cumulative  
 139 performance contribution of preceding time points for optimal feature construction, all frequency bands were  
 140 concatenated while continuously increasing the cumulative number of premovement time-points (from -100  
 141 to -1000 ms) and each set was subjected to training a Wiener Filter. The respective best channel  $R^2$   
 142 performances are shown in Figure 2C. A performance saturation becomes visible when concatenating 5  
 143 time-points from 500 ms (prior to target sample) to 0 ms (target sample), resulting in an optimal input vector  
 144 of 8 frequency bands with 5 time-points (= 40 features) for further analyses.  
 145

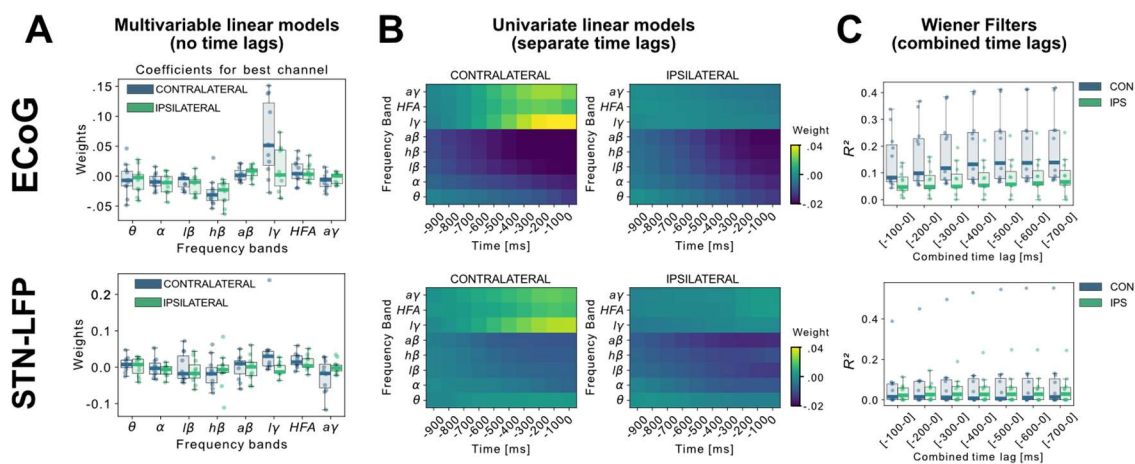

146  
 147 **Figure 2: Linear Models and Wiener Filters reveal temporally and spectrally specific coefficient**  
 148 **distributions with grip-force decoding performance gain by including signals preceding the target**  
 149 **sample by up to 500 ms.** Multivariable linear model coefficients trained only from the instantaneous sample  
 150 (0 time lag with respect to decoded target sample) including all frequency bands from best channels per  
 151 patient resemble movement induced spectral changes with beta desynchronization and gamma  
 152 synchronization (A). ECoG derived coefficients yield higher absolute values than STN-LFP derived  
 153 coefficients. (B) Univariate frequency and time lag specific Linear Models were trained and visualized to  
 154 improve interpretability of average coefficients in the absence of interactions. Low  $\gamma$  (60 - 80 Hz), HFA (90  
 155 - 200 Hz) and all  $\gamma$  (60 - 200 Hz) bands show stronger positive associations for contralateral over ipsilateral  
 156 movements. Moreover, stronger associations are visible for ECoG over STN-LFP signals for  $\beta$ , HFA and  $\gamma$   
 157 bands. (C) Wiener Filters can integrate multiple time-steps in Linear Models leading to an incremental  
 158 performance gain when signals are included preceding the current target sample by up to 500 ms.

## 159 **XGBOOST outperforms other machine learning models for grip-force decoding**

160  
161 In order to build a grip-force decoder, different machine learning (ML) algorithms were tested in a large-  
162 scale Bayesian Optimization hyperparameter search (see Supplementary File 1B for a list of  
163 hyperparameters for each model). Elastic - Net regularized Linear Models, Neural Networks and Gradient  
164 Boosted trees (XGBOOST) (Chen and Guestrin, 2016) were tested for each channel for contra- and  
165 ipsilateral movements. XGBOOST was included as it can learn non-linearities and has advantages over  
166 other models with respect to feature selection. To further utilize potential information derived from spatial  
167 patterns, the Source Power Comodulation (SPoC) framework (Dähne *et al.*, 2014) was used in combination  
168 with Elastic - Net or XGBOOST predictors. Each model was informed by 40 features (8 specific frequency  
169 bands concatenated at 5 time-points ranging from  $t = -500$  ms to  $t = 0$  ms to the target sample) per channel  
170 and evaluated via rigorously cross-validated test-set predictions ranked by  $R^2$  coefficients of determination.  
171 Figure 3 shows performance outcomes for the different machine learning methods, with overall best results  
172 achieved by XGBOOST from ECoG signals (see Supplementary File 1c for further details). Contralateral  
173 ECoG strips had significantly higher decoding performances than ipsilateral ones (contralateral  
174  $R^2=0.31\pm 0.24$ , ipsilateral  $R^2=0.13\pm 0.16$ ,  $p = 0.02$ ). Given the relatively low decoding performances for STN-  
175 LFP, we applied permutation tests to confirm that performance was above chance (contralateral  $p = 0.025$ ,  
176 ipsilateral  $p = 0.028$ ). Corroborating the model choice in previous literature, highest STN performances were  
177 achieved with the Wiener Filter method for contra- and ipsilateral movements (Shah *et al.*, 2018).  
178 Importantly, varying combinations of multiple ECoG and/or STN channels did not lead to significant  
179 performance advantages (Figure 3C+D), which is important for the utility and design of machine learning  
180 enabled implantables.

181

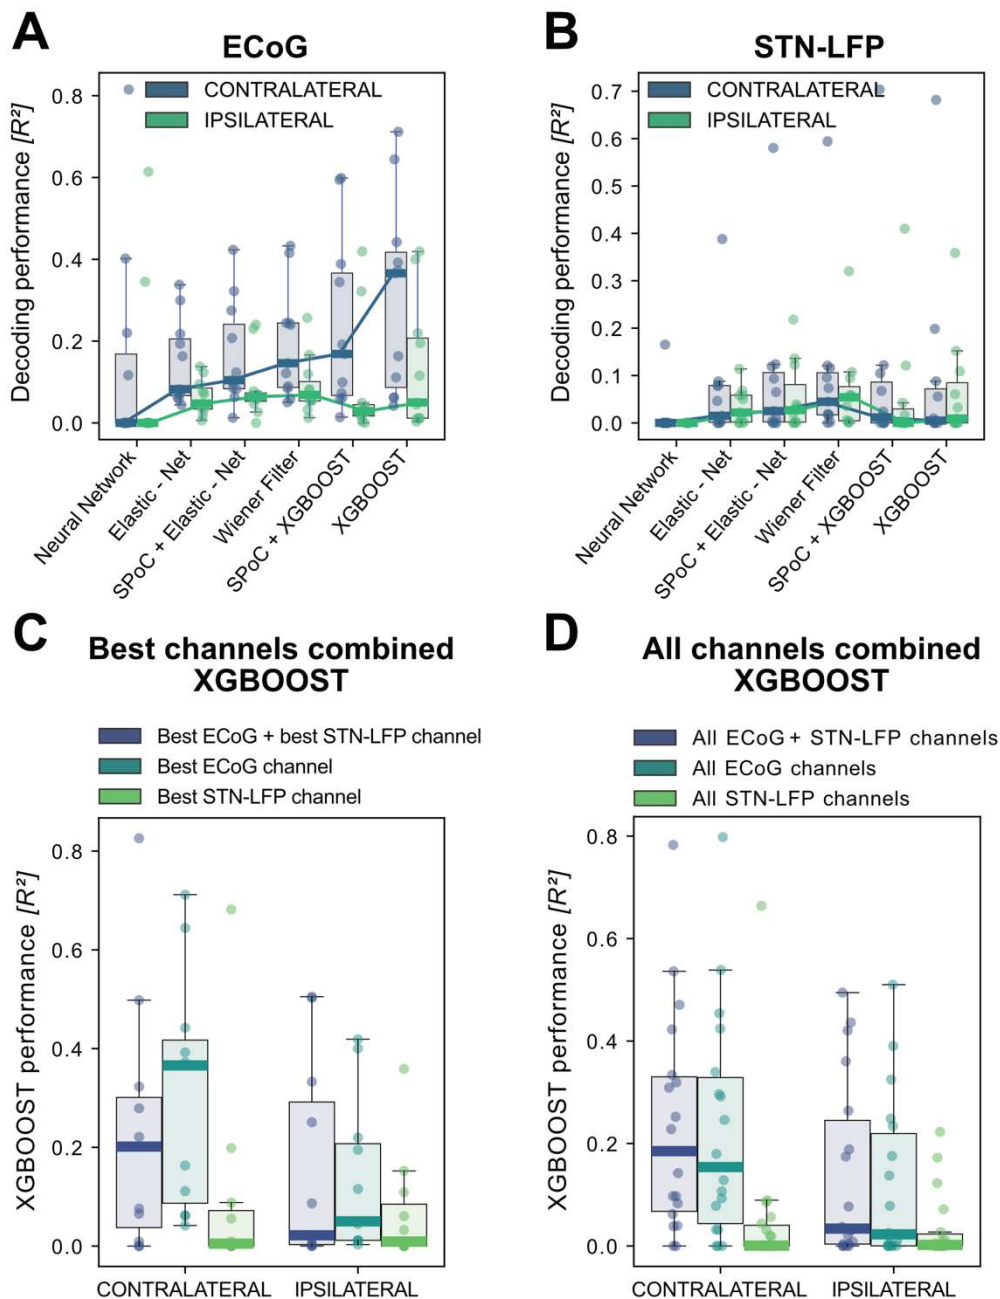

182  
 183 **Figure 3: XGBOOST outperforms other machine learning methods for ECoG based grip-force**  
 184 **decoding.** Based on the presented real-time compatible signal processing pipeline Neural Networks, Elastic  
 185 - Net regularized Linear Models, Wiener Filters and extreme Gradient Boosting (XGBOOST) regression  
 186 models were tested. Mean  $R^2$  test-set grip-force decoding performances are shown for the best channel per  
 187 patient after 10 rounds of Bayesian Optimization of hyperparameters with nested cross-validation for ECoG  
 188 (A) and STN-LFP (B). The same pipeline was subjected to spatial feature extraction approach using all  
 189 available channels of an electrode for each patient with Source Power Comodulation (SPoC). Best ECoG  
 190 (A) performances were obtained by XGBOOST regressors. STN-LFP signals (B) did not exhibit performance  
 191 gain when applying advanced machine learning methods. The mean ECoG vs. STN XGBOOST  
 192 performance differences of contralateral  $\Delta R^2 = 0.21 \pm 0.18$  and ipsilateral  $\Delta R^2 = 0.069 \pm 0.08$  movements,

193 indicate the higher grip-force decoding performance of ECoG over STN signals. The mean test-set  
194 prediction performances were higher for ECoG than for STN-LFP signals across all patients, for both contra-  
195 and ipsilateral movements. Best ECoG channels outperformed best STN-LFP channels and the  
196 combination of best channels from both ECoG and STN-LFP (C). When combining multiple channels,  
197 performances improve through the combination of ECoG and STN-LFPs (D), but the performances remain  
198 below individual best ECoG channels as depicted in (C). For combined ECoG + STN – LFP training, the  
199 model learned specific combinations between both feature locations and failed to select only the best ECoG  
200 features due to overfitting.

201

## 202 **Grip-force decoding performance is correlated with PD motor impairment and** 203 **subthalamic beta burst dynamics**

204

205 To investigate potential sources of bias from patient specific information on grip-force decoding  
206 performance, we performed Spearman's correlations with the grand average from all contra -and ipsilateral  
207 decoding performances. Averaging was necessary to obtain one value per patient. Age ( $\rho = -0.16$ ,  $p = 0.32$ ),  
208 disease duration in years ( $\rho = 0.31$ ,  $p = 0.17$ ) and number of movements ( $\rho = -0.41$ ,  $p = 0.11$ ) and movement  
209 variability ( $Rho = -0.49$ ,  $p = 0.06$ ) did not reveal significant correlations. We further investigated whether  
210 motor impairment related to the hypodopaminergic state in PD can explain differences in grip-force decoding  
211 across patients. Therefore, we correlated preoperative OFF medication total UPDRS-III scores, which  
212 revealed negative correlations for best ECoG ( $\rho = -0.55$ ,  $p = 0.039$ ) and STN-LFP ( $\rho = -0.55$ ,  $p = 0.042$ )  
213 channels (Figure 4A+B). Combined ECoG and STN channel performance also showed significant  
214 correlations ( $\rho = -0.54$ ,  $p = 0.045$ ), as well as combined ECoG ( $\rho = -0.55$ ,  $p = 0.045$ ) and combined STN-  
215 LFP performances ( $\rho = -0.61$ ,  $p = 0.024$ ). To test whether the correlation measure was corrupted by outliers,  
216 we repeated the analysis using the robust percentage-bend correlation (Pernet, Wilcox and Rousselet,  
217 2013) which replicated the significant association between UPDRS total score and mean contra -and  
218 ipsilateral channel performance for ECoG ( $r = -0.62$ ,  $p = 0.04$ ) and STN ( $r = -0.7$ ,  $p = 0.016$ ). This correlation  
219 was temporally specific to decoding of ongoing grip-force, indicative of the models' underestimation of motor  
220 output (Figure 4C). Thus, the lower decoding performance in patients with more severe symptom severity  
221 could not be attributed to changes in decoder output in the absence of movement or temporal imprecision.  
222 This has practical implications and highlights the importance of investigating interactions between disease  
223 and machine learning approach for neural implants.



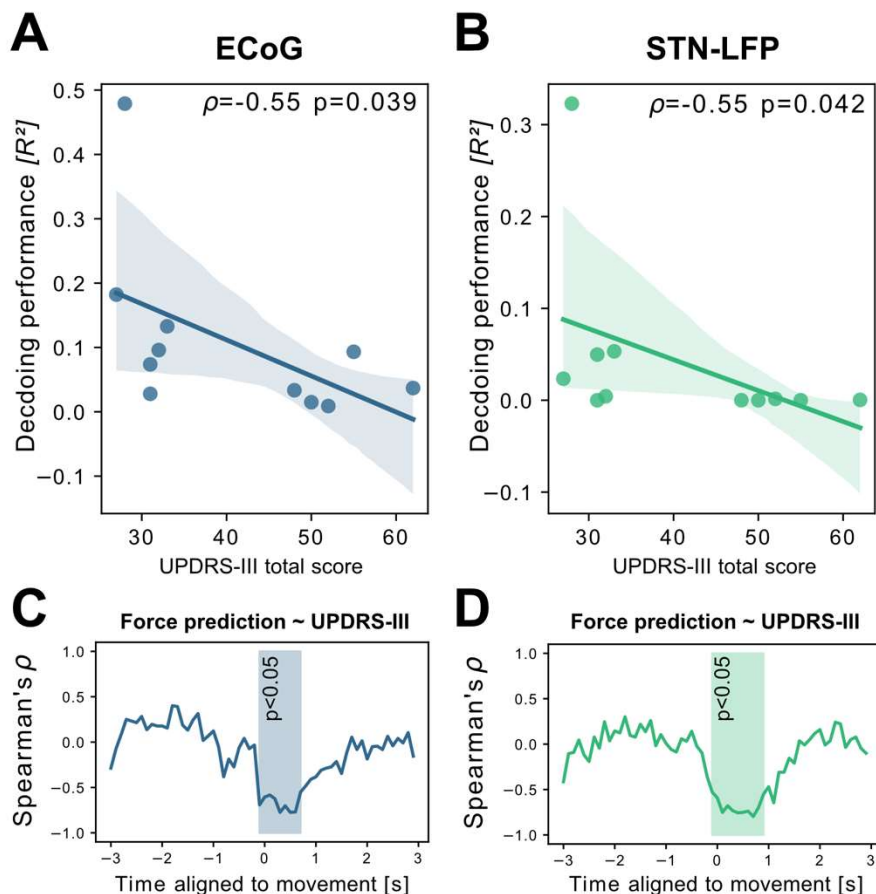

224  
225 **Figure 4: Grand average grip-force decoding performances correlate inversely with preoperative PD**  
226 **motor sign severity.** UPDRS-III scores show significant negative correlations with patient-wise XGBOOST  
227 grip-force decoding performance averages for (A) ECoG ( $\rho = -0.55$ ,  $p = 0.039$ ) and (B) STN-LFP signals ( $\rho$   
228  $= -0.55$ ,  $p = 0.042$ ). The temporal specificity of this correlation is revealed through movement aligned  
229 sample-wise correlations of average force prediction model output with UPDRS-III scores across patients  
230 (cluster based corrected significant segments are displayed shaded) (C+D).  
231

232 To better understand the relationship of PD pathophysiology and grip-force decoding performance we have  
233 further investigated associations between cortical and subthalamic beta burst dynamics. We follow the  
234 methodology of previous reports that demonstrated that the time spent in beta burst correlates with  
235 impairment of movement kinematics (Torrecillos *et al.*, 2018). Beta bursts were defined as threshold  
236 crossings of the beta feature vector above the 75<sup>th</sup> percentile of the baseline period. Following the previous  
237 finding that specifically the time-spent in low-beta but not high-beta bursts was correlated with PD motor  
238 impairment (Lofredi *et al.*, 2019), we investigated these bands separately for the motor preparation period  
239 (-1 to 0 s with respect to movement onset) and movement execution period (0 to 1 s following movement  
240 onset). To uncover a potential relationship of the beta-burst metric with PD pathophysiology, we performed  
241 correlations with UPDRS-III total scores. Significant correlations were found between UPDRS-III and low-  
242 beta bursts in STN-LFP signals during motor preparation ( $\rho = 0.63$ ,  $p = 0.02$ ; Figure 5A) and movement

243 execution ( $\rho = 0.56$ ,  $p = 0.04$ ; data not shown), but not for the high-beta band ( $p > 0.05$ ). Conversely, for  
244 ECoG high-beta but not low-beta burst dynamics during motor preparation but not movement periods were  
245 significantly correlated with UPDRS-III total scores ( $\rho = 0.55$ ,  $p = 0.04$ ). In summary, we provide evidence  
246 that both subthalamic and cortical beta burst dynamics relate to PD motor sign severity with subthalamic  
247 low-beta bursts showing the most robust correlations, both during motor preparation and movement periods.  
248 To relate these findings to movement decoding performance from cortex, we correlated the grand average  
249 XGBOOST grip-force decoding performances from ECoG channels (as above for UPDRS-III) with high- and  
250 low-beta burst dynamics in both ECoG and STN-LFP signals. ECoG based grip-force decoding performance  
251 was significantly correlated with subthalamic low-beta burst dynamics during motor preparation ( $\rho = -0.76$ ,  
252  $p = 0.004$ ) and movement execution ( $\rho = -0.71$ ,  $p = 0.005$ ; Figure 5B). Subthalamic burst dynamics in the  
253 high-beta band also correlated with ECoG decoding performances during movement ( $\rho = 0.71$ ,  $p = 0.007$ )  
254 but not motor preparation. Cortical burst dynamics from ECoG signals did not reveal significant correlations  
255 with ECoG based grip-force decoding performances. Relevant correlations alongside exemplar burst  
256 visualizations and corresponding grip-force decoding traces are shown in Figure 5.

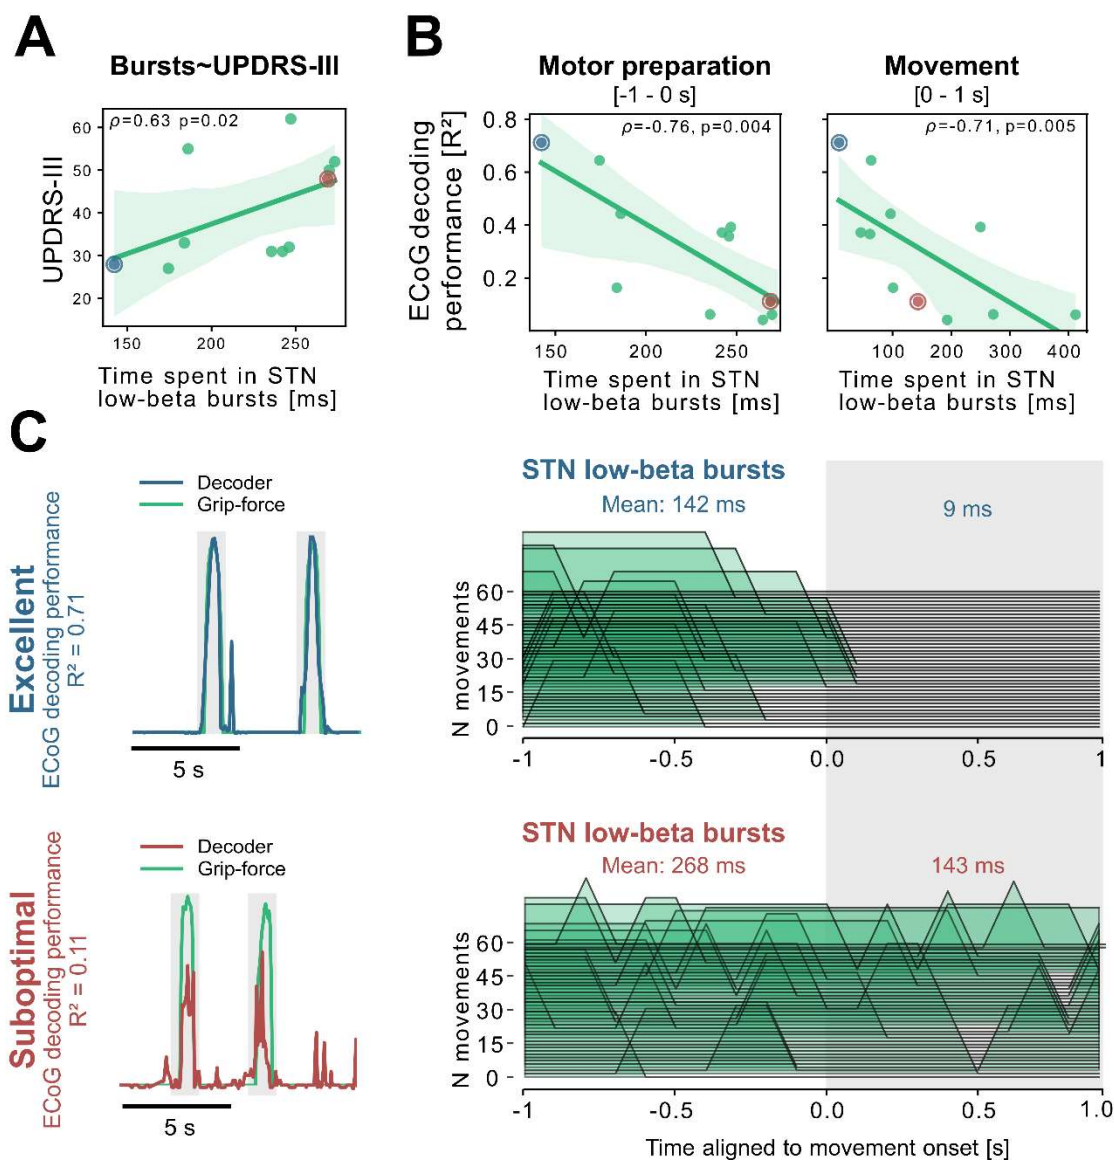

257  
 258 **Figure 5: Subthalamic low-beta bursts relate to PD motor impairment and are associated with lower**  
 259 **ECoG decoding performance.** UPDRS-III scores are significantly correlated with time spent in subthalamic  
 260 low-beta bursts in the motor preparation period (A) and during movement (not shown). Average XGBOOST  
 261 decoding performance correlated inversely with time spent in subthalamic low-beta bursts during motor  
 262 preparation and movement performance (B). Patient examples with excellent ( $R^2 = 0.71$ ; blue) and  
 263 suboptimal ( $R^2 = 0.11$ ; red) performances are highlighted in (B) and shown in further detail in (C). Note the  
 264 difference in decoder output with respect to the original grip-force trace (left panel) and the differences in  
 265 burst frequencies and durations across movement repetitions (right panel) in the motor preparation and  
 266 movement execution (grey shaded area) period.

267  
 268  
 269  
 270

271 **Brain mapping of grip-force decoding performance from invasive cortical and**  
272 **subthalamic recordings**

273  
274 The spatial distributions of decoding performance on cortex and STN for contra- and ipsilateral movements  
275 are shown in Figure 6. To evaluate the relevance of recording location with respect to decoding  
276 performance, we calculated correlations of performance measures with a priori defined implantation targets,  
277 namely the dorsolateral STN (Caire *et al.*, 2013; Horn, Kühn, *et al.*, 2017) and the hand-knob of the  
278 precentral gyrus (Mayka *et al.*, 2006). Linear mixed effects models showed a significant within-subject  
279 relation for contralateral ECoG decoding performances ( $\beta=-0.002$ , Lower CI=-0.003, upper CI=-0.001,  $R^2=$   
280  $0.57$ ,  $p<0.001$ ), but not STN locations ( $p > 0.05$ ). The dependent variable was the decoding performance,  
281 the fixed effect was the distance to hand knob area or dorsolateral STN respectively, and the random effect  
282 the subject. Repeating the analyses across electrodes and patients in a cross-validated manner revealed  
283 no significant predictive value ( $p > 0.05$ ). Thus, Euclidean distance to hand knob area for ECoG and  
284 therapeutic target for STN was significantly correlated with decoding performance within patients, but could  
285 not predict decoding performance across channels or patients.

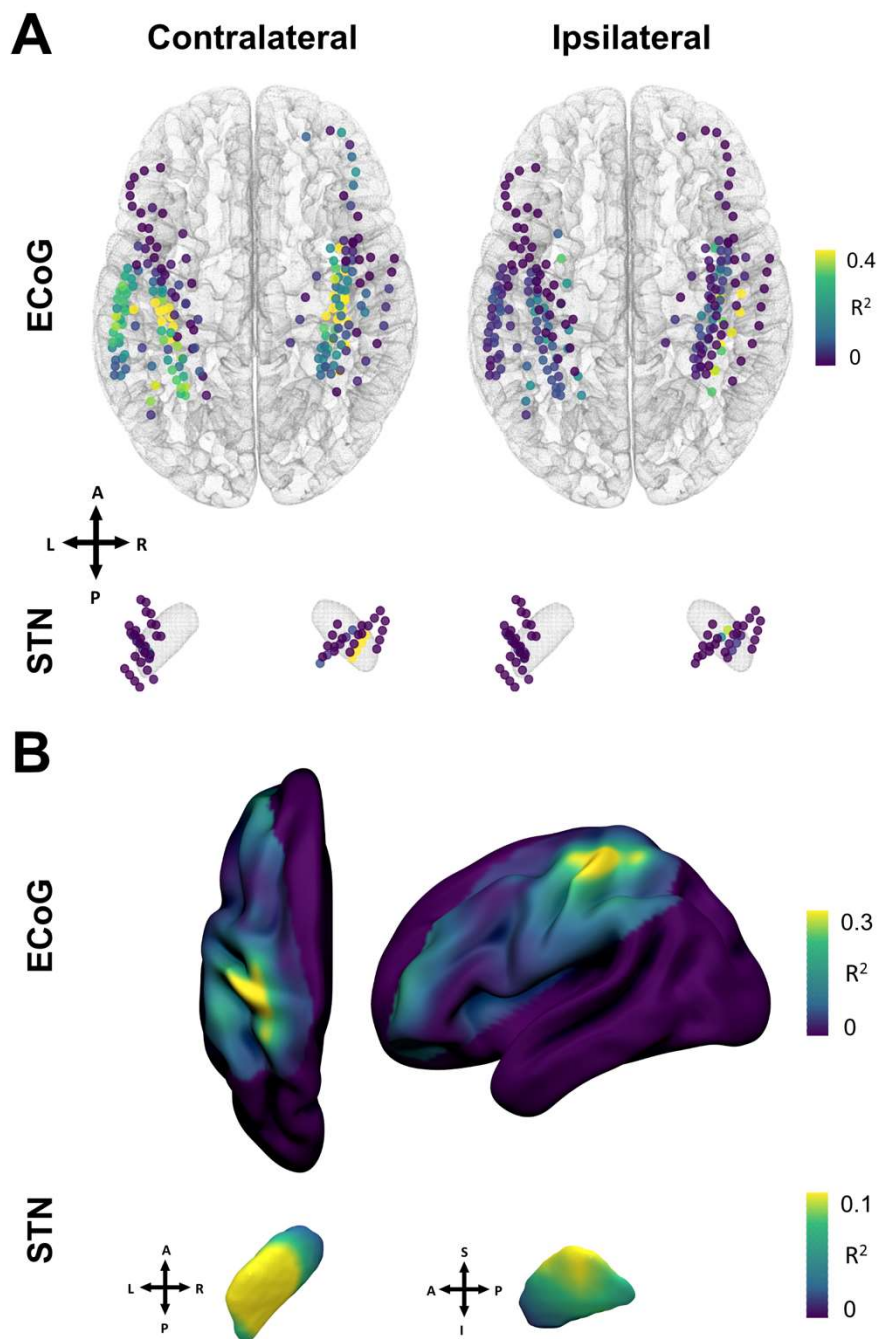

286  
287 **Figure 6: Grip-force decoding performances spatially peak in sensorimotor cortex and the**  
288 **dorsolateral STN.** (A) Channels are color coded for individual XGBOOST grip-force regression  
289 performances per channel. Performance differences shown are in favor of ECoG over STN and contralateral  
290 over ipsilateral recording locations for movement decoding. (B) Spatial interpolation across all contacts  
291 projected to the left hemisphere shows peak performances in sensorimotor cortex. STN interpolated  
292 decoding performance peaks in the dorsolateral portion of the STN, in proximity to the best therapeutic  
293 target (Caire *et al.*, 2013).  
294

295 **Whole-brain connectomics can aid the discovery of brain networks underlying the**  
296 **neural encoding of grip-force**

297  
298 The ability to account for decoding performances for invasive electrodes may soon become as important as  
299 accounting for variance in stimulation effects, as bidirectional clinical brain computer interfaces will rely both  
300 on electrical sensing and stimulation. Recently, network mapping of neurostimulation targets has shown  
301 utility to predict variance in clinical outcomes following DBS (Horn, Reich, *et al.*, 2017; Horn and Fox, 2020;  
302 Li *et al.*, 2020). Here, we extended the same framework to predict variance in grip-force decoding  
303 performance observed from single channels, using the XGBOOST grip-force decoding results. In this  
304 approach – termed *prediction network mapping* – we calculated functional and structural connectivity  
305 *fingerprints* by projecting each recording location to a group connectome that was acquired in a cohort of  
306 PD patients. These fingerprints denote to which other brain areas each site is connected to. Using a  
307 discriminative fiber tracking analysis, (Baldermann *et al.*, 2019; Li *et al.*, 2020) we analyzed the predictive  
308 value of structural connectivity from ECoG recording locations (for an exemplar case see Figure 7A) for  
309 XGBOOST decoding performance. Therefore, diffusion imaging derived whole-brain fiber connectome data  
310 traversing to more than 20% of recording locations were used (Figure 7B). The specific fiber distributions  
311 included structural projections spanning sensory, motor and prefrontal cortex, and could significantly predict  
312 decoding performance of left out channels ( $\rho = 0.38$ ,  $p < 0.0001$ ; thresholded at a false discovery rate  $\alpha =$   
313  $0.05$ ) and patients ( $\rho = 0.37$ ,  $p < 0.0001$ ) in a cross validated manner (Figure 7D). Next, we created spatial  
314 models of optimal decoding performance for functional connectivity (R-Maps are shown in Figure 7C). This  
315 model led to significant predictions of decoding performance in leave-one-channel-out ( $\rho = 0.37$ ,  $p < 0.0001$ )  
316 and leave-one-subject-out cross validations (functional connectivity  $\rho = 0.37$ ,  $p < 0.0001$ ) (Figure 7E). The  
317 results were further validated with voxel-wise correlations using the statistical parametric mapping (SPM)  
318 framework (see methods for further details). Models such as the two presented here could be generalized  
319 to all BCI applications and used to identify brain networks that encode specific behavioral and clinical target  
320 variables.

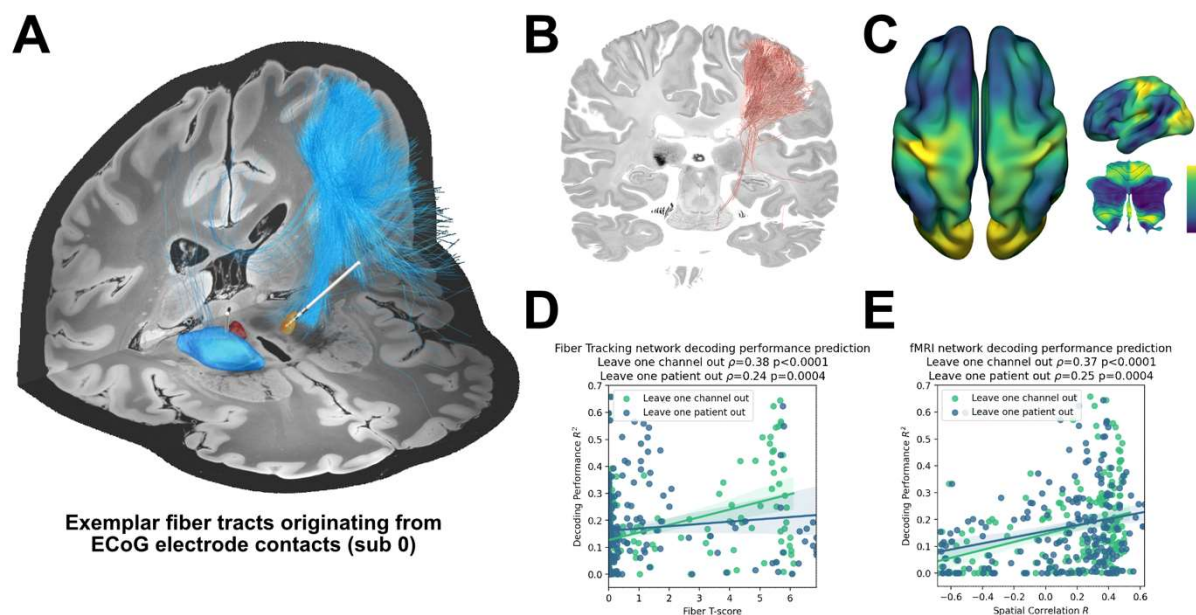

Exemplar fiber tracts originating from ECoG electrode contacts (sub 0)

321  
322 **Figure 7: Structural and functional movement decoding network analysis reveals cerebellar as well**  
323 **as sensorimotor cortical decoding capacity.** (A) Visualization of fibers originating from the ECoG  
324 recording locations of subject 1. (B) Decoding performance across all subjects and channels significant fiber  
325 tracts are displayed. All ECoG contacts were projected to the left hemisphere. For every fiber a t-test statistic  
326 between connected and unconnected brain regions was calculated. Only significant fibers, indicating  
327 structural connectivity to grip-force decoding performance, are shown. (C) The optimal R-Map is shown for  
328 the cortical surface as well as cerebellum for fMRI functional connectivity. Fingerprints were calculated  
329 between the functional connectivity of every electrode contact to all other voxels. The R-Map was then  
330 calculated as a correlation between individual contact fingerprints and the contact specific  $R^2$  decoding  
331 performance. (D) Fiber tracking connectivity predicts grip-force decoding performance (leave one channel  
332 out cross validation  $\rho = 0.38$ ,  $p < 0.0001$ , leave one patient out cross validation  $\rho = 0.24$ ,  $p = 0.0004$ ). Here  
333 each individual point represents a statistic of connected and unconnected fibers of each contact or patient.  
334 The previously calculated fiber statistic within each cross-validation fold could thus predict the channel or  
335 patient specific performance. (E) Functional connectivity predicts decoding performance (leave one channel  
336 out cross validation  $\rho = 0.37$ ,  $p < 0.0001$ , leave one patient out cross validation  $\rho = 0.25$ ,  $p = 0.0004$ ). The  
337 spatial correlation between individual fingerprints and the cross-validation specific R-Map, predicts left out  
338 decoding performances.

## 339 340 341 Discussion

342  
343 Bidirectional brain computer interfaces will revolutionize the treatment of previously intractable brain  
344 disorders with brain signal decoding based adaptive neuromodulation. DBS provides a unique platform to  
345 trailblaze neurophysiological approaches, disease specific modulation and computational strategies for  
346 brain signal decoding for next-generation brain implants. Here, we investigated clinical and computational  
347 strategies for grip-force decoding as a representative and pathophysiologically relevant behavioral target  
348 variable. We used multimodal invasive neurophysiology time-series data in PD patients undergoing DBS  
349 electrode implantation. Our findings can be broken down into four advances to the field: 1) we developed a

350 new decoding approach based on multispectral time-concatenated band-power measures, subjected to  
351 Bayesian optimized extreme gradient boosted ensembles (XGBOOST): this outperformed traditional linear  
352 model-based methods and may be generalized to all brain signal-based regression problems. 2) Next, we  
353 demonstrate that electrocorticography signals outperform subthalamic LFP for grip-force decoding,  
354 supporting the utility of additional ECoG in adaptive DBS research for PD patients. 3) Our findings link PD  
355 motor impairment, PD pathophysiology with deterioration in decoding performance, highlighting a potential  
356 impairment in movement coding capacity through subthalamic low-beta bursts during motor preparation and  
357 execution periods. 4) Finally, we could significantly predict how well a specific recording site would perform  
358 to decode grip force based on brain connectivity. This novel framework (termed prediction network mapping)  
359 can be used in future implants to identify connectomic networks from which brain sensing can predict  
360 symptoms and behavior.

361

## 362 **Limitations**

363

364 Our analysis is retrospective in nature and the data were obtained in context of a Go/No-Go task, which  
365 may have implications on the generalizability of the findings in the application during naturalistic behavior.

366 All model training and evaluations were conducted offline. Nevertheless, we took meticulous care to exclude

367 any circularity in processing and machine learning applications. To this date, such circularities are

368 overlooked in some movement decoding papers with filtering, normalization and time frequency

369 transformation across entire sessions, thus reaching into the future from the point of the individually decoded

370 sample. Ridding our analysis from data that would be unavailable in a real-time setting as reported in this

371 study, leads to worse performances, but gives a more realistic estimate of model performance in the clinical

372 use-case. While gripping is a relevant motor skill for human behavior, our findings are restricted to the

373 decoding of grip-force and may have limited generalizability to other movements. The overall number of

374 patients in this study is low. This may have limited a more detailed analysis of bias and other factors, beyond

375 the described correlation of clinical symptom severity, subthalamic beta burst dynamics, electrode location

376 and connectomics. Most importantly, the signal to noise ratio may further impact decoding accuracies

377 differently for ECoG and LFP signals. This could in part explain why decoding from ECoG signals may

378 benefit more from complex and non-linear model architectures. The comparability of ECoG and LFP

379 recordings was further affected by the higher number of available ECoG channels, when compared to only

380 three bipolar LFP channels. However, the large effect size of superior decoding performances with ECoG

381 may indicate that this bias does not relevantly impact the interpretation of our findings. An additional

382 limitation was the relatively small amount of available data per patient, which was constrained by the

383 intraoperative setting (see Table 1). For deep learning approaches we expect better performances with

384 increased dataset sizes, which may become available, either through externalized extraoperative recordings

385 (He *et al.*, 2021) or sensing enabled implantable devices (Opri *et al.*, 2020; Gilron *et al.*, 2021). Importantly,

386 our finding that decoding performances from single contacts outperform multi-electrode models may be a

387 consequence of a combination of short recording durations in this study, suboptimal computational model



388 selection and the fact that sensorimotor cortex and STN are part of the same circuit that is synchronized in  
389 oscillations. While we have made an effort to accommodate models that are optimized for spatio-spectral  
390 feature learning, and we are confident that these cannot outperform single channel approaches in this  
391 dataset, future studies should cautiously reinterrogate this issue in larger datasets, e.g. by implementing  
392 neural networks optimized for this purpose (Peterson et al., 2021). Finally, we should acknowledge that the  
393 exploration of the neural feature space in this study was non-exhaustive, and further raw data features, such  
394 as the local motor potential (Mehring et al., 2004), waveform shape features (Cole and Voytek, 2017) and  
395 aperiodic signal components (Wilson, Castanheira and Baillet, 2022) could further improve decoding  
396 performances in future movement decoding studies.

397

### 398 **Decoding grip force based on invasive electrophysiology**

399  
400 Our study defines a novel computational strategy to decode grip-force based on ECoG and LFP in patients  
401 undergoing DBS for PD. It explores defined oscillatory feature sets and compares machine learning models  
402 with varying complexity, from linear models to artificial neural networks and regression trees. ECoG based  
403 movement decoding of varying movement types has been previously investigated in epilepsy patients that  
404 underwent electrophysiological monitoring (Leuthardt *et al.*, 2004) through which local motor potentials and  
405 gamma band activity were highlighted as informative features (Gunduz *et al.*, 2016). First analyses based  
406 on STN-LFPs in PD patients have shown that Wiener Filter architectures can be successfully used for grip-  
407 force decoding (Tan *et al.*, 2016; Shah *et al.*, 2018). The present study extends these previous reports to a  
408 continuous non-trial-based decoding approach. Furthermore, a direct comparison of ECoG and LFP  
409 performance with relation to systematic machine learning methods was lacking. Our findings indicate that  
410 sensorimotor ECoG recordings are more informative than LFP recordings from the STN for grip-force  
411 decoding. While this finding is robust, we should acknowledge that the size and shape of electrodes (see  
412 Supplementary File 1a) and the spatial orientation and size of the neural architectures that are sampled are  
413 not directly comparable across these methods. Thus, it is difficult to derive the relative importance of the  
414 different brain regions for grip-force and vigor processing in motor control from this comparison. Instead, we  
415 interpret our result as a practical demonstration of the greater utility of ECoG signals for movement  
416 decoding. The results in this study are based on extracted band-power features and show superior  
417 performances with XGBOOST, when compared to other model architectures and algorithms. More  
418 specifically, best performances were obtained for Bayesian optimized XGBOOST models trained on data  
419 from single ECoG channels without additional benefit from channel combinations or combined ECoG and  
420 STN channel sets. In the future, this machine learning approach can be adopted to extend the clinical utility  
421 of invasive brain stimulation approaches for other brain disorders, e.g. through decoding of tics or obsessive  
422 compulsive behavior in neuropsychiatric DBS indications.

423

424

425

## 426 **Towards machine learning based adaptive stimulation in Parkinson's disease**

427  
428 Adaptive DBS (aDBS) has the potential for significant innovation in movement disorders (Starr, 2018). For  
429 Parkinson's disease, different control policies of subthalamic beta band activity are now tested in clinical  
430 trials to improve the treatment for patients with akinetic rigid dominant PD (ClinicalTrials.gov Identifier:  
431 NCT04681534, NCT04547712) (Little *et al.*, 2013; Arlotti *et al.*, 2018; Velisar *et al.*, 2019). Beyond  
432 subthalamic beta power, ECoG recordings were previously used to successfully decode the presence of  
433 dyskinesia through elevated levels of gamma band synchronization. This could be used to reduce  
434 stimulation intensity to alleviate medication and stimulation induced dyskinesia (Swann *et al.*, 2018). Such  
435 single biomarker approaches have the advantage that pathophysiological mechanisms may be the direct  
436 target of intervention, while machine learning based decoding methods derive correlates of symptoms and  
437 behavior indirectly through learning potentially noisy correlations (Neumann *et al.*, 2019). Therefore, single  
438 biomarker based aDBS presents an optimal starting point for investigating the clinical utility of aDBS in  
439 controlled study designs. However, single biomarkers alone cannot account for the diverse and complex set  
440 of clinical signs of PD and behavior, e.g. during gait (Molina *et al.*, 2021; Thenaisie *et al.*, 2022), speech  
441 and tremor (Hirschmann *et al.*, 2013, 2017). Here a versatile decoding based control algorithm may further  
442 improve clinical outcome for these patients in the future (Neumann *et al.*, 2019; Merk *et al.*, 2022). Indeed,  
443 machine learning-based decoding has been successfully described in first translational breakthrough  
444 studies (Opri *et al.*, 2020; Gilron *et al.*, 2021; He *et al.*, 2021). In a complementary approach, we focused  
445 on direct grip-force decoding, motivated by the hypothesis that future aDBS studies increasing DBS  
446 amplitude during periods of higher movement vigor may advance the successful treatment of bradykinesia  
447 in PD. While our previous findings indicate that relative amounts of beta can still signal bradykinesia during  
448 movement, (Lofredi *et al.*, 2019; Feldmann *et al.*, 2021) further positive control parameters could keep  
449 stimulation proportional to intended movement vigor. Moreover, recent reports that beta power correlates  
450 negatively with phasic dopamine release may further substantiate the idea of movement/kinematics based  
451 STN stimulation to support intrinsic movement related dopamine signals (Schwerdt *et al.*, 2020). We may  
452 speculate that DBS constitutes a network modulation that is similar to dopamine transients by suppressing  
453 local firing of the subthalamic nucleus (Milosevic *et al.*, 2018) and shifting the balance of basal ganglia from  
454 indirect to direct pathway activity. As highlighted above it was recently shown in non-human primates that  
455 phasic decreases in beta in the basal ganglia are correlated to phasic dopamine signals during movement  
456 (Schwerdt *et al.*, 2020). Thus, in order to support the intrinsic dopaminergic capacity of PD patients, future  
457 machine learning based aDBS approaches could be complemented by algorithms that inform the stimulation  
458 on behavioral and motor adjustments to mimic intrinsic phasic dopamine signals. Previous studies have  
459 successfully decoded the presence of movement using cortical beta activity (Opri *et al.*, 2020) which could  
460 also become a viable treatment option in PD. However, getting an estimate of movement vigor i.e. through  
461 the prediction of grip-force may complement advanced aDBS control policies, as multivariate models  
462 emerge for the next-generation of neurotherapeutics.

463 Notably, the proposed adaptive stimulation would require a fast algorithmic adaptation of stimulation to  
464 ongoing behavior. This could be combined with additional slower adaptations in response to medication or  
465 sleep cycles. Specifically for PD, beta activity based adaptive stimulation can be well suited to track the  
466 patient's overall symptom state (Tinkhauser and Moraud, 2021) while more rapid stimulation adaptations  
467 based on vigor can follow fast kinematic changes. The utility of vigor-based stimulation and the combination  
468 of this approach with additional slower adaptation algorithms, require further proof-of-concept studies before  
469 the clinical utility can be foreseen. In our study, we demonstrate that motor symptom severity itself can have  
470 direct and negative effects on decoding performance, which we should keep in mind during clinical decision  
471 making. Previous studies have shown that the presence of beta bursts correlated with motor performance  
472 in cortex (Little *et al.*, 2019) and STN (Torrecillos *et al.*, 2018), which could degrade decoding performance  
473 (Khawaldeh *et al.*, 2020). Our study replicates and extends these findings, as we show a direct correlation  
474 between movement related beta burst dynamics and PD motor sign severity. More importantly, our results  
475 show that the amount of time the STN is bursting in the low-beta band, during motor preparation and  
476 movement execution is inversely correlated with ECoG based grip-force decoding performance. An obvious  
477 interpretation of this finding is that excessive synchronization in the STN may impair flexible motor control  
478 by decreasing information coding capacity and neural entropy as previously suggested in animal studies  
479 (Mallet *et al.*, 2008; Cruz *et al.*, 2009) and recently suggested for subthalamic beta bursts (Velasco *et al.*,  
480 2022). Again based on the inverse relationship of beta activity and dopamine (Schwerdt *et al.*, 2020), we  
481 may speculate that beta bursts may relate to transient dips in dopamine signaling. Dopamine was shown to  
482 precede and invigorate future movement (da Silva *et al.*, 2018). If subthalamic beta bursts indicate phasic  
483 decreases in dopaminergic innervation, we could expect a loss of invigoration and reinforcement of ongoing  
484 neural population activity in the cortex – basal ganglia – thalamic loop, which offers an elegant explanation  
485 for the lower decoding performance from ECoG signals in the absence of obvious cortical activity patterns.  
486 Beyond beta bursts our findings indicate general impact of motor symptoms in the hypodopaminergic state  
487 on machine learning based kinematic decoding capacity. This highlights the conceptual relevance of  
488 disease specific interactions with computational models. Interestingly, in the hypodopaminergic state, the  
489 model output underestimated the grip force extent produced by the patients. This could reflect a loss of  
490 neural vigor representations related to insufficient dopaminergic modulation (Turner and Desmurget, 2010).  
491 In the future, we will have to account for the individual impact of disease specific changes in brain signals  
492 that affect decoding performance. Further, our results corroborate the notion that dopamine plays a key role  
493 in coding and modulating neural representations of movement kinematics in the human brain.

494

### 495 **Connectomics can aid the discovery of brain networks underlying encoding of** 496 **clinical and behavioral target variables**

497  
498 Decoding performance for clinical BCI may be drastically improved when adjusting brain signal recording  
499 sites to the underlying interconnected network that is relevant for encoding of the specific target behavior.  
500 For instance, when decoding language or speech, one could envision that recordings at either Broca's or

501 Wernicke's region could be helpful, but a combination of both could be optimal. The two regions form a  
502 network with direct connections via the Arcuate Fascicle. In the present study we have leveraged multisite  
503 recordings from various electrode locations across patients to identify the network that would be most  
504 informative for grip force decoding. For this endeavor, we adapted two existing methods that are able to  
505 isolate i) connected voxels and ii) connected fiber tracts (Horn, Reich, *et al.*, 2017; Li *et al.*, 2020) associated  
506 with a specific target metric (such as grip-force decoding performance in the present case). While Euclidean  
507 distance to motor target, i.e. hand knob area for ECoG and therapeutic target for STN, was significantly  
508 correlated with decoding performance within-subject, this simplistic notion could not predict decoding  
509 performance across channels or patients. Thus, proximity to landmarks alone does not reliably help the  
510 identification of optimal recording sites. Given the complexity and vast distribution of movement related brain  
511 areas, from cerebellum to frontal cortex to parietal cortex, it may not be surprising that whole-brain  
512 connectomics outperform single region of interest based distance metrics for predicting informative  
513 recording locations. The development of a connectomic identification of optimal decoding locations has  
514 important implications in clinical adoptions of BCI technology. Preoperative identification of brain networks  
515 would allow the design of optimal electrode architectures and targeted implantation to cover strategic nodes  
516 of distributed networks for decoding of clinical variables and behavior. Moreover, connectomic approaches  
517 can inform the optimal spatial feature selection of pretrained machine learning models to facilitate brain  
518 signal decoding without the requirement for individual (re-)training. Importantly, the connectomic models  
519 that we used can be trained based on multiple dimensions of input-output relationships, e.g. for decoding  
520 of behavior like grip-force, but also for decoding clinical signs, such as tremor or mood disturbances. Thus,  
521 when implanting a high-density ECoG grid, connectomic analyses can generate target specific contact  
522 combinations, e.g. focusing on primary cortex for tremor and supplementary motor area for motor intention  
523 and bradykinesia. Our results highlight the utility of whole-brain connectomics to predict machine learning-  
524 based brain signal decoding performance that can be generalized to any bidirectional clinical brain-computer  
525 interface use-case. In the future, neurosurgeons may not target individual sensing locations in isolation, but  
526 instead determine optimal implant trajectories in accordance with whole-brain connectomic fingerprints for  
527 optimal BCI performance.

528

## 529 **Conclusion**

530  
531 Our analysis from PD patients undergoing DBS implantation showed that ECoG recordings outperform STN-  
532 LFP recordings for grip-force decoding throughout different machine learning methods, with XGBOOST  
533 showing the highest performance. Parkinsonian motor sign severity and subthalamic low-beta bursts were  
534 associated with loss of decoding performance, indicating a specific link between PD pathophysiology,  
535 kinematic coding capacity and motor impairment. To investigate the spatial relationship of ECoG decoding  
536 performances in the brain, we have formalized a connectomic framework that could cross-predict decoding  
537 performances across recording sites and patients, based on underlying whole brain MRI connectivity  
538 patterns. Our findings highlight the utility of ECoG for intelligent adaptive stimulation in PD, corroborate the

539 role of PD symptom severity in kinematic coding and pave the way for connectomic neurosurgery for  
540 machine learning-based brain signal decoding. We hypothesize that future neurotechnological treatments  
541 may have the potential to outperform traditional drug regimes, due to a key advantage in the temporal and  
542 spatial precision of therapeutic delivery towards a precision medicine approach for intelligent adaptive DBS  
543 (Neumann *et al.*, 2019; Neumann and Rodriguez-Oroz, 2021; Merk *et al.*, 2022).

544

## 545 **Materials and Methods**

546

### 547 **Participants**

548 The current study is based on previously published data (Alhourani *et al.*, 2020). In brief, subthalamic LFP  
549 and subdural ECoG recordings were simultaneously acquired from 11 PD patients. The patients were  
550 subjected to bilateral STN-DBS lead implantation, as proposed by standard clinical indications criteria. In  
551 accordance with protocol #PRO13110420, approved by the Institutional Review Board of the University of  
552 Pittsburgh, informed consent for all patients was obtained prior to any surgical procedure. The subject  
553 characteristics are detailed in Table 1. UPDRS Part III scores for the off-medication conditions were  
554 collected in a time period of 1-3 months prior to surgery by movement disorder neurologists. Dopaminergic  
555 medications were withheld for at least 12 hours before intraoperative testing.

556 Table 1: Subject characteristics

| N  | Gender | UPDRS total | Hemisphere | Age  | Movements | Disease duration [years] | ECoG Strip Contact Number Left | ECoG Strip Contact Number Right |
|----|--------|-------------|------------|------|-----------|--------------------------|--------------------------------|---------------------------------|
| 0  | Male   | 28          | R          | 60.3 | 128       | 10.7                     | 0                              | 6                               |
| 1  | Male   | 27          | L+R        | 51.2 | 464       | 14                       | 28                             | 28                              |
| 2  | Male   | 33          | L+R        | 53.8 | 213       | 7.2                      | 8                              | 8                               |
| 3  | Male   | 31          | L+R        | 44.2 | 285       | 10.1                     | 8                              | 8                               |
| 4  | Male   | 32          | 2L+2R      | 63.6 | 381       | 13.1                     | 28+8                           | 28+8                            |
| 5  | Male   | 52          | L          | 59.6 | 84        | 5.9                      | 6                              | 0                               |
| 6  | Male   | 55          | L          | 71.6 | 161       | 1.4                      | 6                              | 0                               |
| 7  | Male   | 50          | L          | 52.5 | 131       | 8.7                      | 6                              | 0                               |
| 8  | Male   | 62          | L+R        | 66.8 | 547       | 9.8                      | 6                              | 6                               |
| 9  | Male   | 48          | L          | 67.9 | 86        | 17.1                     | 6                              | 0                               |
| 10 | Female | 31          | R          | 69   | 205       | 10.4                     | 0                              | 6                               |

557

### 558 **Behavioral Paradigm**

559

560 The behavioral task performed for this study was previously described (Kondylis *et al.*, 2016; Alhourani *et*  
561 *al.*, 2020; Fischer *et al.*, 2020) and it is schematically shown in Figure 1A. The task included Go/No-Go cues

562 with randomized inter-trial interval durations. Feedback durations were adjusted based on grip force reaction  
563 times. In the present analyses, time-series were virtually streamed as continuous data to simulate real time  
564 grip-force decoding, irrespective of task trials. Subjects were fully awake, and no anesthetic agents were  
565 administered for at least 1 hour before the task procedure. No medication was given during the task. The  
566 task paradigm was implemented using the Psychophysics Toolbox (Brainard, 1997) on a portable computer.  
567 The trials consisted of a simultaneous presentation of a yellow traffic light in the center of a screen, and a  
568 cue on one side indicating which hand the subject should use for the subsequent response of squeezing  
569 the handgrip. The cue remained on screen for 1000 - 2000 ms, followed by the traffic light changing either  
570 green or red, signaling a “go cue” and “no-go cue” respectively. Subjects performed the task for a  
571 cumulative total time of 10 to 25 min. As the present study focuses on grip-force decoding performance  
572 based on the electrophysiological signals, all sessions containing valid movements were merged per subject  
573 for further analysis. To validate that the used grip-force label in our data varies not only between two  
574 movement states, but constitutes a relevant regression problem with varying force amplitude and velocity,  
575 all movement maximum amplitudes and velocity traces are visualized in the *Figure 1-figure supplement 1*.  
576

## 577 **Electrophysiological Recordings**

578  
579 Subdural electrode strips were implanted temporarily through standard frontal burr holes located near the  
580 coronal suture and aimed posteriorly to the hand knob motor cortex region. Strip targeting has been  
581 previously described and was based on markings of stereotactically defined overlying scalp locations  
582 (Kondylis *et al.*, 2016). STN-DBS electrodes were implanted bilaterally, targeting the dorsolateral motor area  
583 of the STN. ECoG data were recorded intra-operatively using six-contact (left n = 5 patients, right n = 3),  
584 eight-contact (left n = 3, right n = 3) and twenty-eight-contact (left n = 2, right n = 2) strip electrodes. The  
585 electrode details are shown in *Supplementary File 1a* and all ECoG and STN electrodes are plotted in Figure  
586 1B (mean number of electrode contacts were  $10.18 \pm 11.29$  for left and  $8.9 \pm 12$  for right hemispheres). A  
587 referential montage was used in which the reference electrode was placed in the scalp and a ground  
588 electrode was placed in the skin overlying the acromion process. ECoG and STN signals were filtered (0.3–  
589 7.5 kHz), amplified, and digitized at 30 kHz using a Grapevine neural interface processor (Ripple Inc.). Force  
590 signals were digitally recorded simultaneously with the ECoG and STN-LFP signals. LFPs from the STN  
591 were recorded using the clinical DBS lead (model 3389, Medtronic) from all four contacts and referenced  
592 offline in a bipolar montage. All signals were resampled to 1 kHz for offline analysis. To investigate the  
593 variability of grip-force as a potential bias for decoding performance, we calculated the variance of peak  
594 force across movement repetitions.

## 595 **Electrode Localization**

596 Subdural electrode reconstructions were obtained by aligning pre-operative MRI, intra-operative  
597 fluoroscopy, and postoperative CT. Representative images of this technique were previously shown in detail  
598 (Randazzo *et al.*, 2016). In short, the CT and MRI were co-registered using mutual information using the

599 SPM software library and rendered onto 3D skull and brain surfaces using Osirix (v7.5) (Rosset, Spadola  
600 and Ratib, 2004) and Freesurfer (v5.3) software packages (Dale, Fischl and Sereno, 1999), respectively.  
601 These surfaces and the fluoroscopy images were then aligned according to common points: stereotactic  
602 frame pins, implanted depth electrodes, and skull outline positions (Randazzo *et al.*, 2016). The parallax  
603 effect of the fluoroscopic images was accounted for using the obtained distance from the radiation source  
604 to the subject's skull. Succeeding the surface-to-fluoroscopic image orientation alignment, a 3D location for  
605 each electrode contact was projected from the fluoroscopic image to the cortical surface. Deep brain  
606 stimulation electrode locations were reconstructed using the advanced neuroimaging pipeline defined by  
607 Lead-DBS using default settings (Horn *et al.*, 2019). In brief, preoperative MRI and postoperative CT scans  
608 were co-registered and normalized to MNI 2009b NLIN ASYM space. Electrode artefacts were visually  
609 identified and marked to obtain MNI coordinates of DBS electrode contacts. All electrode localizations are  
610 visualized in Figure 1B.

611

## 612 **ECoG and LFP preprocessing and feature extraction**

613  
614 The entire preprocessing pipeline used in the present study was optimized for real-time performance and  
615 inspired by the Berlin Brain Computer Interface (Blankertz *et al.*, 2006). Processing was performed in Python  
616 using custom code based on MNE-python (Gramfort *et al.*, 2013), mne\_bids (Appelhoff *et al.*, 2019) and  
617 pybv (<https://pybv.readthedocs.io/en/stable/>). All raw data files were saved in the iEEG-BIDS structure  
618 (Holdgraf *et al.*, 2019). To account for baseline drifts, the force traces were cleaned using a normalization  
619 approach presented for previous ECoG finger trajectory decoding (Xie, Schwartz and Prasad, 2018). A real-  
620 time data stream of untouched electrophysiological raw data was emulated to ensure that all processing  
621 that can impact decoding is performed in a real-time compatible manner. Referencing was performed online  
622 (i.e. after streaming virtual data packets). All LFP recordings were referenced bipolarly, against the adjacent  
623 contacts (0-1, 1-2, 2-3 with contact 0 being the lowest by convention of the manufacturer). Throughout the  
624 manuscript, we adopt the clinical usage of electrodes (also named "leads") and contacts from the DBS  
625 realm. During preprocessing (in pseudo real time), we derive 3 bipolar STN-LFP channels from 4 adjacent  
626 contacts in one DBS electrode (also called "lead"). We also follow this nomenclature for ECoG, where we  
627 call the entire strip an "electrode". ECoG electrodes in our dataset can have varying number of contacts  
628 (see Supplementary File 1a). ECoG recordings were referenced by subtracting the common average of all  
629 ECoG electrodes, therefore the number of channels per ECoG electrode is equal to the number of contacts  
630 per strip. To facilitate computationally efficient real-time enabled algorithms, time frequency decomposition  
631 for the machine learning analysis was conducted by bandpass filtering in the  $\theta$  (4-8 Hz),  $\alpha$  (8-12 Hz),  $\beta$  (13-  
632 35 Hz), low  $\beta$  (13-20 Hz), high  $\beta$  (20-35 Hz), all  $\gamma$  (60-200 Hz), low  $\gamma$  (60-80 Hz) and high-frequency activity,  
633 (90-200 Hz) frequency bands. Overlapping broad  $\beta$  and  $\gamma$  bands were added in addition to subbands to  
634 enable the investigation of distinct interactions within these frequency bands (Figure 1C). To estimate band  
635 specific activity, different time durations were used for band-pass filtering with longer time segments for  
636 lower frequencies, and shorter time segments for higher frequencies ( $\theta$  = 1000 ms,  $\alpha$  and  $\beta$  bands = 500

637 ms,  $\gamma = 100$  ms). To get an estimate of amplitude of the activity in the filtered signals, variance was extracted  
638 in intervals of 1 s in a sliding window of 100 ms resulting in a time resolution of 10 Hz. All variance estimates  
639 were normalized by subtracting and dividing by the median in a sliding window of 10 s to account for  
640 differences in impedance and proximity to the source before subjecting the data to the machine learning  
641 analysis. All features were clipped as an artifact rejection mechanism when they exceeded a normalized  
642 value of  $[-2 \ 2]$ . The used normalization is fully compatible with a real time prediction approach, as data  
643 acquired in the future do not influence the present predictions. See figure 1E for an outline of the methods  
644 pipeline. For the purpose of visualization, Morlet wavelets (7 cycles) were used to demonstrate the entire  
645 time-frequency decomposition (Figure 1C).

646

## 647 **Machine learning training and evaluation**

648

649 A rigorous nested cross-validation approach was implemented. An outer 3-fold cross validation split the  
650 data into folds of two third training and one third test set. For each individual channel a Bayesian  
651 Optimization hyperparameter search (Frazier, 2018) was then conducted for 10 rounds using the training  
652 set only. For each round the training data was trained and tested in an inner 3-fold cross-validation with 80  
653 percent training size. Post-hoc assessment confirmed convergence in performance after a maximum of 5  
654 rounds in all recordings. The mean  $R^2$  coefficient of determination of every test set estimate of the outer  
655 cross-validation was used as the performance measure as defined below:

$$656 \quad R^2(y, \hat{y}) = 1 - \frac{\sum_{i=1}^n (y_i - \hat{y}_i)^2}{\sum_{i=1}^n (y_i - \bar{y})^2}$$

657 Since the  $R^2$  metric can be lower than zero for predictions that are worse than constant predictions, we used  
658 a lower threshold at zero to make performances comparable for the purpose of visualization. The input  
659 features for every model were all eight previously described frequency bands. In order to test the  
660 contribution of time points preceding the decoded target sample, frequency band features of different time  
661 points were concatenated and compared with respect to their decoding performance. The present study  
662 investigated commonly used and promising linear and non-linear machine learning algorithms, specifically  
663 elastic net regularized linear models, linear Wiener filters, neural networks, gradient boosted decision trees  
664 (XGBOOST) and source power comodulation.

## 665 **Linear Models**

666 Linear models can capture underlying feature dependencies and reveal those as correlations in each weight  
667 parameter. Input features are multiplied by a weight coefficient. The dot product of the weight vector  $\mathbf{w}$  and  
668 feature vector  $\mathbf{x}$  is then shifted by the bias  $b$ . The feature vector in this analysis is the vector of all frequency  
669 bands for a single time point. The prediction label  $y$  is the baseline corrected gripping force. For a linear  
670 regression the activation function is linear, is defined as follows:

$$671 \quad y = \mathbf{w}\mathbf{x} + b$$



672 To prevent overfitting, regularization in the form of  $l_1$  and  $l_2$  norm is commonly used. Here we tested  
673 different parameters of the elastic-net (enet) regularization (Zou and Hastie, 2005), which is a combination  
674 of the  $l_1$  and  $l_2$  norm specified by the regularization hyperparameters  $\alpha$  and  $\rho$ , respectively. The objective  
675 function of the enet model follows:

$$676 \min_{\mathbf{w}} \frac{1}{2n_{\text{samples}}} \|\mathbf{X}\mathbf{w} - \mathbf{y}\|_2^2 + \alpha\rho\|\mathbf{w}\|_1 + \frac{\alpha(1-\rho)}{2}\|\mathbf{w}\|_2^2$$

677 where  $\mathbf{X}$  is a matrix of dimension  $n \times m$  whom  $i^{\text{th}}$  row is the feature vector  $\mathbf{x}$  of size  $m$  and  $\mathbf{w}$  is the solution  
678 vector, which, due to the  $l_1$  sparse regularization term, most of the coefficient will be expected to be zero.  
679 For hyperparameter-search,  $\alpha$  and  $\rho$  were both sampled from a uniform distribution ranging from zero to  
680 one. Since elastic nets are solved using gradient descent, the maximum training iteration also needs to be  
681 specified. Here an iteration number of 1000 has been used. The implementation was done using the scikit  
682 learn Python package (Pedregosa *et al.*, 2011).

## 683 Wiener Filters

684 Tan *et al.* described the use Wiener filters in the application of force estimation from STN-LFP signals (Shah  
685 *et al.*, 2018). Here the output  $y$  is a weighted sum of features in the time and frequency domain in the weight  
686 matrix  $\mathbf{W}$ .  $I$  frequency band features are used together with  $J$  lags. For the regression analysis the activation  
687 function is kept linear, as follows:

$$688 \quad \quad \quad 689 \quad y(n) = \sum_{j=0}^J \sum_{i=0}^I w_{ij} x_i(n-j)$$

690 This equation has a closed form solution, known as the normal equation (Proakis and Monolakis, 1996).  
691 Wiener filters essentially implement a multivariable linear model with multiple time-steps. Using Wiener  
692 filters we tested the contribution of different concatenated time-steps of brain signals preceding the decoded  
693 target sample. This provides insight about the optimal feature length in the time domain.  
694

## 695 Neural Networks

696 We have further investigated the utility of artificial neural networks. While linear models and Wiener filters  
697 may underfit the data, neural networks can be very complex and have a higher risk to overfit with increasing  
698 complexity. The ideal model architecture finds a balance between under and over-fitting to the training  
699 dataset. In this context not only single weight correlations of band features could contribute to force decoding  
700 performances, but a richer representation of feature invariances in combinations of different frequency  
701 bands may be learned by additional layers and units of the model. The architecture of neural networks is  
702 derived from linear models with non-linear activation functions, which are referred to in this context as units.  
703 Multiple units are combined in different layers with different activation functions.

704 Explicitly, the output  $y$  of the  $i^{\text{th}}$  unit in layer  $l$  is the weighted sum of activations of the previous layer units  
705  $y_k^{l-1}$  with weights  $w_{ik}^l$ ,

$$706 \quad y_i^l = f^l\left(\sum_k w_{ik}^l y_k^{l-1} + b_i^l\right)$$

707  
708 Neural networks are trained through a cost function using a gradient descent algorithm. Hyperparameters  
709 were adjusted in order to prevent over- and underfitting (Geman, Bienenstock and Doursat, 1992). Here  
710 neural networks were tested with at least one hidden layer. The input nodes of this layer were in the  
711 hyperparameter search uniformly sampled in a range of 1 to 10. The number of hidden dense layers were  
712 sampled from a range of 1 to 3 layers. The hidden dense layer neurons were uniformly sampled in a range  
713 of 1 to 10. Sigmoidal and hyperbolic tangent activation functions were tested in the hidden layers. After each  
714 hidden layer a batch normalization layer and a dropout layer with a factor of 0.2 was added. The output  
715 activation function was set linear. The used training algorithm was the Adam optimizer (the learning rate  
716 was sampled from a log uniform distribution from 0.0001 to 0.01,  $\beta_1$  was set to 0.9,  $\beta_2$  to 0.999 and  $\epsilon$  to  
717 0.999). The Adam optimizer improves backpropagation such that each weight parameter is adapted  
718 according to its first and second momentum (Kingma and Ba, 2015). Each neural network was trained using  
719 1000 epochs with a batch size of 100. The loss function was set to the mean squared error. To prevent  
720 overfitting, the training set was further split into train and validation set with 80 percent train. The validation  
721 dataset was then used for early stopping with a patience parameter of 10 epochs. The model with lowest  
722 validation error is then used for test set prediction. Due to poor performances, the inner cross validation was  
723 left out for the neural network training sequence. Neural Networks were implemented using the TensorFlow  
724 framework (Abadi *et al.*, 2016).

## 725 **Gradient Boosted Trees using the XGBOOST Framework**

726 A common problem with neural networks is the high dependency on the provided set of features and  
727 potential to learn spurious input-output associations. In this analysis a feature vector of all 8 frequency bands  
728 concatenated for 5 time points requires a Wiener Filter with 40 weights. In an architecture like neural  
729 networks all these features are contributing to the overall force prediction, nevertheless not all weight  
730 parameters are promising. Decision Tree algorithms overcome this problem naturally by implementing  
731 optimization of input feature use in their architecture. Thus, decision trees and random forests, first  
732 described by Breiman (Breiman, 2001), were proven to be a robust, accurate and successful tool for solving  
733 machine learning tasks, including classification, regression, density estimation and manifold learning or  
734 semi-supervised learning (Gall and Lempitsky, 2013). Random forests are an ensemble method consisting  
735 of many decision trees. A decision tree is a statistical optimal data segregation method, that is only controlled  
736 by conditional sequences. Different implementations were proposed on top of Decision Trees. AdaBoost  
737 (Schapire, 2009) is an adaptive learning algorithm that builds up successive decision trees iteratively. By  
738 that an ensemble of multiple weighted weak learners are combined to yield a strong estimator. Gradient  
739 Boosting is built using the same concept. According to Empirical Risk Minimization it fits each decision tree

740 based on the residuals of a defined objective function. This objective function is typically based on an error  
741 loss and a regularization term. The model is initialized using a constant value. In an iterative process the  
742 new trees are added to the model up till the maximum defined estimators are reached. Here the scalable  
743 tree boosting framework XGBOOST (Chen and Guestrin, 2016) was used. In this analysis the number of  
744 boosting rounds is set to 10. The depth of each tree is sampled uniformly in a range from 1 to 100. When  
745 adding new trees to the model the parameter learning rate  $\eta$  is scaling the contribution of each tree  
746 prediction and is sampled here log uniformly from of the range  $[10^{-5}, 1]$ . Regularization in Gradient Boosted  
747 Trees is controlled by different factors. One of the factors is the minimum splitting loss  $\gamma$ . For every decision  
748 tree new nodes were added only if the *gain* metric was above  $\gamma$ . It is here sampled from a uniform distribution  
749 between 1 and 10. Hyperparameters for all used machine learning methods are listed in detail in  
750 Supplementary File 1b.

### 751 **Source Power Comodulation**

752 A state of the art movement prediction approach is the source separating framework called Source Power  
753 Comodulation (SPoC) (Dähne *et al.*, 2014). Oscillatory sources are here extracted based on their power  
754 comodulation with the force gripping target. SPoC was implemented using the MNE framework (Gramfort  
755 *et al.*, 2013). Thus, discriminant neural sources are made visible. In this context, the band-power at each  
756 frequency band of interest was calculated by taking the logarithm of the variance of the projected signal in  
757 the source space. For sake of comparison, only one spatial filter was used for feature computation at each  
758 frequency band. In the same manner as before, a Wiener filter was then applied in order to resample time  
759 lags up to 500 ms. Here again, the band power features are then used as input features. A Bayesian  
760 Optimization hyperparameter search was also here implemented for both the enet model as well as the  
761 XGBOOST framework with the aforementioned parameters.

### 762 **Hyperparameter Search: Bayesian Optimization**

763 All models underwent an extensive hyperparameter search using Bayesian optimization. A common  
764 problem using machine learning algorithms is finding the optimal hyperparameter settings given a certain  
765 architecture. *Grid search* exhaustively tries out all provided hyperparameters while *Random search* only  
766 draws random parameters from the given hyperparameter distributions. Sampling the error loss function  
767 can be computationally expensive. Bayesian Optimization formulates this problem into an optimization  
768 problem. Here a cost function is minimized given a set of hyperparameters. Instead of sampling from the  
769 objective cost function, a probabilistic model is defined. The hyperparameters minimizing the negative  
770 expected improvement *are selected* given a multinomial Gaussian process *using a Matern kernel*. Those  
771 parameters are then used to sample from the respective regressor in the given dataset. The resulting error  
772 is used to update the gaussian process distribution and given the maximum expected improvement, the  
773 next best hyperparameter set is drawn. This process is repeated for the elastic net, *neural networks and*  
774 XGBOOST architecture for 10 iterations. For every round a 3 fold cross validation is used in order to prevent

775 overfitting. Given log-uniform distributions a wide range of hyperparameters can thus be sampled in a  
776 computationally efficient manner. The implementation was done using the scikit-optimize framework  
777 (<https://scikit-optimize.github.io/stable/>). *Supplementary File 1b* lists the hyperparameters subjected to  
778 Bayesian optimization. The chosen methodology is non-exhaustive and primarily serves the comparison of  
779 variance in decoding explained by the recording location of the signal (ECoG vs. STN), motor symptom  
780 severity (UPDRS-III), beta bursts and brain networks. It further gives an intuition about the potential of more  
781 complex and elaborate machine learning methods for brain computer interfaces.

782

### 783 **Definition of best model and best channels**

784  
785 Previous studies have repeatedly demonstrated that using a single optimal channel in the STN is  
786 advantageous over using all available channels (Shah *et al.*, 2018). Most importantly, addition of more  
787 channels leads to decreased generalization and higher risk of overfitting with little performance benefit.  
788 Based on these results and to account for varying numbers of available electrode contacts, one channel  
789 with optimal decoding performance on the cross-validation test set was chosen per patient to quantify and  
790 compare decoding performance for the ECoG and STN analysis across patients. Since hyperparameter  
791 optimization is implemented only within each inner cross validation fold, any circularity and data leakage is  
792 circumvented. A robust decoding performance estimate is thus obtained through left out testing data only.

793

### 794 **Analysis of beta bursts during motor preparation and movement execution** 795 **periods**

796  
797 To investigate a potential relationship between grip-force decoding performance and beta burst activity, we  
798 have adopted a previously validated approach to movement related burst analyses (Torrecillos *et al.*, 2018;  
799 Lofredi *et al.*, 2019). Therefore, the beta feature time-series were used and a threshold constituting the 75<sup>th</sup>  
800 percentile of the rest periods were calculated. Next, threshold crossings of at least 100 ms lengths in the  
801 motor preparation (-1 to 0 s with respect to movement) and movement execution (0 to 1 s with respect to  
802 movement execution) were marked as bursts. In previous reports, the most informative metric was the “time  
803 spent in burst” which is calculated as the sum of burst durations in the time period of interest. This metric is  
804 directly proportional to the burst probability at a given time-point. All burst analyses were repeated for the  
805 low-beta and high-beta bands in ECoG and STN-LFP. The times spent in bursts were correlated with  
806 UPDRS-III and ECoG based decoding performances.

807

### 808 **Prediction Network Mapping with whole-brain connectomics**

809  
810 To investigate whether decoding performance from different recording locations can cross-predict decoding  
811 performances across patients, we developed a whole-brain connectomics based approach. Therefore,  
812 ECoG electrode recording locations were projected to normative structural and functional MRI data  
813 (Parkinson's Progression Markers Initiative [PPMI]; [www.ppmi-info.org](http://www.ppmi-info.org)) using Lead-DBS software in Matlab

814 ([www.lead-dbs.org](http://www.lead-dbs.org)). (Horn *et al.*, 2019) The PPMI connectomes of patients with PD (n = 74) was priorly  
815 computed (Ewert *et al.*, 2018) and has been used in context of DBS multiple times (Horn, Neumann, *et al.*,  
816 2017; Neumann *et al.*, 2018; de Almeida Marcelino *et al.*, 2019; Lofredi *et al.*, 2021). No patient specific  
817 diffusion or functional MRI was required for this analysis. Seeding from each recording site resulted in  
818 connectivity profiles (fingerprints) that were expressed as voxel-wise whole-brain volumes for functional and  
819 structural connectivity and a set of streamline connections for structural connectivity. We have adapted  
820 three previously published methods leveraging normative connectomes as predictive models.  
821 First, fiber streamlines representative of structural connectivity between ECoG channels and all other brain  
822 areas were isolated and assigned with a “Fiber T-score”, associating XGBOOST decoding performance  
823 with the fiber tracts connectivity from respective ECoG recording locations across patients using mass-  
824 univariate two-sample t-tests between  $R^2$  scores in connected vs. unconnected recording locations. Only  
825 fibers with significant t-scores surviving FDR correction at an alpha level 0.05 were considered further. Next,  
826 T-values were used as weights in an aggregated fiber score to predict out of training sample channel and  
827 patients’ performances. Next, functional connectivity maps were used to generate an “R-Map”, a  
828 connectivity model which is associated with optimal decoding performance, by performing voxel-wise  
829 correlations of connectivity and decoding performance from recording locations. The connectomic  
830 fingerprint from each recording location can then be assigned a spatial correlation coefficient that may have  
831 predictive value for the underlying decoding performance. The predictive value of these two methods were  
832 confirmed using “leave-one-channel-out” and “leave-one-subject-out” cross-validation. Finally, statistical  
833 parametric mapping was used to confirm the described correlations of structural and functional connectivity  
834 using linear-mixed effects models. In a voxel-wise approach, structural connectivity between ECoG  
835 channels and all other brain areas was calculated using Lead Mapper ([www.lead-dbs.org](http://www.lead-dbs.org)). Statistical voxel-  
836 wise correlation between decoding performance and structural and functional connectivity, separate mixed  
837 effects models, with a subject based random effect, were corrected for multiple comparisons with random  
838 field theory as implemented in the Statistical parametric mapping (SPM12) toolbox  
839 (<https://www.fil.ion.ucl.ac.uk/spm/>). Functional connectivity strengths between recording sites and  
840 sensorimotor cortex (peak coordinate x = -38, y = -22, z = 72), parietal lobe (x = 6, y = -32, z = 82), striatum  
841 (x = -34, y = -24, z = 26) and cerebellum (x = 18, y = -50, z = -50 and x = -22, y = -52, z = -54) accounted  
842 for decoding performance. Similarly, for structural connectivity, a significant cluster in the sensorimotor  
843 region (x = -44, y = -18, z = 70) correlated with high decoding performance. All connectivity analyses were  
844 performed using ECoG recording locations with contralateral  $R^2$  performances (Figure 1E). A schematic  
845 illustrating the different steps of functional and structural prediction network mapping can be found in Figure  
846 7-figure supplement 1.

847

848

## 849 **Statistical Analysis**

850

851 Results are stated as mean  $\pm$  standard deviation. All significance testing was performed using two-sided  
852 Monte-Carlo permutation tests and bootstrapping. P-values were obtained by shuffling value positions and  
853 determining the resulting original rho value percentile in the distribution of surrogate combinations.  
854 Spearman's correlations were performed because of small sample size and varying distributions. Clinical  
855 correlations were performed using preoperative UPDRS-III total scores. To test for the temporal specificity  
856 of the clinical correlation with decoding performance, we performed sample-wise correlations of decoding  
857 output with UPDRS-III total scores across subjects. Multiple comparisons were corrected by adjusting the  
858 significance threshold  $\alpha$  to the false discovery rate (Benjamini and Hochberg, 2000).

859

## 860 **Data availability**

861  
862 The original raw data can be made available after definition and institutional signatures on data sharing  
863 agreements in accordance to data privacy protection and data governance laws. The code and data for the  
864 reproduction of every Figure, machine learning and statistical analysis are openly available at the GitHub  
865 repository ([https://github.com/neuromodulation/icn/tree/master/ECOG\\_vs\\_STN](https://github.com/neuromodulation/icn/tree/master/ECOG_vs_STN)).

866

## 867 **Funding**

868  
869 The present manuscript was supported through a US-German Collaborative Research in Computational  
870 Neuroscience (CRCNS) grant to R.S.T., R.M.R. and W.J.N. with funding from the German Federal Ministry  
871 for Research and Education and NIH (R01NS110424). Further funding was provided through  
872 Deutsche Forschungsgemeinschaft (DFG, German Research Foundation) – Project-ID 424778371 – TRR  
873 295 to A.H. and W.J.N.

874 A.H. was supported by the German Research Foundation (Deutsche Forschungsgemeinschaft, Emmy  
875 Noether Stipend 410169619 and 424778371 – TRR 295) as well as Deutsches Zentrum für Luft- und  
876 Raumfahrt (DynaSti grant within the EU Joint Programme Neurodegenerative Disease Research, JPND).

877 Some data used in the preparation of this article were obtained from the PPMI database ([www.ppmi-info.org/](http://www.ppmi-info.org/)  
878 data). For up-to-date information on the study, visit [www.ppmi-info.org](http://www.ppmi-info.org). PPMI, a public–private partnership,  
879 is funded by the Michael J. Fox Foundation for Parkinson's Research. For funding partners, see [www.ppmi-](http://www.ppmi-info.org/fundingpartners)  
880 [info.org/fundingpartners](http://www.ppmi-info.org/fundingpartners).

881

## 882 **Supplementary Figure Legends**

883

884 Figure 1-figure supplement 1: Analyzed movements show variability in maximum amplitude and velocity.

885 (A) All used normalized and baseline corrected grip force traces. (B) Maximum peak amplitude histogram

886 (C) All movement trace velocities.

887

888 Figure 7-figure supplement 1: “Prediction Network Mapping” allows for prediction of machine learning  
889 decoding performances using functional and structural connectivity. (A) Functional connectivity  
890 “Fingerprints” are estimated using fMRI resting state correlations of the Volume of Tissue Activated (VTA)  
891 voxels correlation to all other voxels. (B) The correlation of every fingerprint voxel values and their  
892 respective  $R^2$  decoding performances allow for calculation of the optimal connectivity profile for maximum  
893 decoding performance called “R-MAP”. (C) The R-MAP correlation with individual fingerprints of cross  
894 validation left out channels, or set of channels for single subjects, allows for prediction of decoding  
895 performance. High correlation with the R-MAP optimal connectivity predicts high decoding performance.  
896 (D) Structural connectivity can be used for decoding performance prediction. For all fibers a two sample t-  
897 test estimates a t value of connected and unconnected decoding performance contacts. The fiber t-value  
898 can thus be predictive of decoding performance.

899

#### 900 **Supplementary File 1 Legends**

901 Supplementary File 1a: Electrode Details  
902 Supplementary File 1b: Bayesian Optimization Hyperparameters  
903 Supplementary File 1c: Best channel  $R^2$  performances  
904

905

#### 906 **References**

907

908 Abadi, M. *et al.* (2016) ‘TensorFlow: A system for large-scale machine learning’, *Proceedings of*  
909 *the 12th USENIX Symposium on Operating Systems Design and Implementation, OSDI 2016*  
910 [Preprint].

911 Alhourani, A. *et al.* (2020) ‘Subthalamic Nucleus Activity Influences Sensory and Motor Cortex  
912 during Force Transduction’, *Cerebral Cortex*, 30(4), pp. 2615–2626. doi:10.1093/cercor/bhz264.

913 de Almeida Marcelino, A.L. *et al.* (2019) ‘Subthalamic neuromodulation improves short-term  
914 motor learning in Parkinson’s disease’, *Brain*, 142(8), pp. 2198–2206.  
915 doi:10.1093/brain/awz152.

916 Androulidakis, A.G. *et al.* (2007) ‘Dopaminergic therapy promotes lateralized motor activity in  
917 the subthalamic area in Parkinson’s disease’, *Brain*, 130(2), pp. 457–468.  
918 doi:10.1093/brain/awl358.

919 Appelhoff, S. *et al.* (2019) ‘MNE-BIDS: Organizing electrophysiological data into the BIDS format  
920 and facilitating their analysis’, *Journal of Open Source Software*, 4(44), p. 1896.  
921 doi:10.21105/joss.01896.

922 Arlotti, M. *et al.* (2018) ‘Eight-hours adaptive deep brain stimulation in patients with Parkinson  
923 disease’, *Neurology*, 90(11), pp. e971–e976. doi:10.1212/WNL.0000000000005121.

- 924 Baldermann, J.C. *et al.* (2019) 'Connectivity Profile Predictive of Effective Deep Brain Stimulation  
925 in Obsessive-Compulsive Disorder', *Biological Psychiatry*, 85(9), pp. 735–743.  
926 doi:10.1016/j.biopsych.2018.12.019.
- 927 Benjamini, Y. and Hochberg, Y. (2000) 'On the Adaptive Control of the False Discovery Rate in  
928 Multiple Testing With Independent Statistics', *Journal of Educational and Behavioral Statistics*,  
929 25(1), pp. 60–83. doi:10.3102/10769986025001060.
- 930 Beudel, M. and Brown, P. (2016) 'Adaptive deep brain stimulation in Parkinson's disease',  
931 *Parkinsonism & Related Disorders*, 22 Suppl 1, pp. S123-126.  
932 doi:10.1016/j.parkreldis.2015.09.028.
- 933 Blankertz, B. *et al.* (2006) 'The Berlin Brain-Computer Interface: Machine Learning Based  
934 Detection of User Specific Brain States.', *Journal of Universal Computer Science*, 12, p.  
935 581–607.
- 936 Brainard, D.H. (1997) 'The Psychophysics Toolbox', *Spatial Vision*, 10(4), pp. 433–436.  
937 doi:10.1163/156856897X00357.
- 938 Breiman, L. (2001) 'Random forests', *Machine Learning* [Preprint].  
939 doi:10.1023/A:1010933404324.
- 940 Cagnan, H. *et al.* (2019) 'Emerging technologies for improved deep brain stimulation', *Nature*  
941 *Biotechnology*, 37(9), pp. 1024–1033. doi:10.1038/s41587-019-0244-6.
- 942 Caire, F. *et al.* (2013) 'A systematic review of studies on anatomical position of electrode  
943 contacts used for chronic subthalamic stimulation in Parkinson's disease', *Acta Neurochirurgica*,  
944 155(9), pp. 1647–1654; discussion 1654. doi:10.1007/s00701-013-1782-1.
- 945 Chen, T. and Guestrin, C. (2016) 'XGBoost: A Scalable Tree Boosting System', in *Proceedings of*  
946 *the 22nd ACM SIGKDD International Conference on Knowledge Discovery and Data Mining*. New  
947 York, NY, USA: Association for Computing Machinery (KDD '16), pp. 785–794.  
948 doi:10.1145/2939672.2939785.
- 949 Cole, S.R. *et al.* (2017) 'Nonsinusoidal Beta Oscillations Reflect Cortical Pathophysiology in  
950 Parkinson's Disease', *The Journal of Neuroscience: The Official Journal of the Society for*  
951 *Neuroscience*, 37(18), pp. 4830–4840. doi:10.1523/JNEUROSCI.2208-16.2017.
- 952 Cole, S.R. and Voytek, B. (2017) 'Brain Oscillations and the Importance of Waveform Shape'.
- 953 Cruz, A.V. *et al.* (2009) 'Effects of Dopamine Depletion on Network Entropy in the External  
954 Globus Pallidus', *Journal of Neurophysiology*, 102(2), pp. 1092–1102.  
955 doi:10.1152/jn.00344.2009.



- 956 Dähne, S. *et al.* (2014) 'SPoC: a novel framework for relating the amplitude of neuronal  
957 oscillations to behaviorally relevant parameters', *NeuroImage*, 86, pp. 111–122.  
958 doi:10.1016/j.neuroimage.2013.07.079.
- 959 Dale, A.M., Fischl, B. and Sereno, M.I. (1999) 'Cortical surface-based analysis: I. Segmentation  
960 and surface reconstruction', *NeuroImage* [Preprint]. doi:10.1006/nimg.1998.0395.
- 961 Ewert, S. *et al.* (2018) 'Toward defining deep brain stimulation targets in MNI space: A  
962 subcortical atlas based on multimodal MRI, histology and structural connectivity', *NeuroImage*,  
963 170, pp. 271–282. doi:10.1016/j.neuroimage.2017.05.015.
- 964 Feldmann, L.K. *et al.* (2021) 'Subthalamic beta band suppression reflects effective  
965 neuromodulation in chronic recordings', *European Journal of Neurology*, 28(7), pp. 2372–2377.  
966 doi:10.1111/ene.14801.
- 967 Fischer, P. *et al.* (2020) 'Movement-related coupling of human subthalamic nucleus spikes to  
968 cortical gamma', *eLife*. Edited by N.C. Swann, L.L. Colgin, and N.C. Swann, 9, p. e51956.  
969 doi:10.7554/eLife.51956.
- 970 Frazier, P.I. (2018) 'A Tutorial on Bayesian Optimization', *arXiv preprint arXiv:1012.2599*  
971 [Preprint].
- 972 Gall, J. and Lempitsky, V. (2013) *Decision Forests for Computer Vision and Medical Image*  
973 *Analysis, Decision Forests for Computer Vision and Medical Image Analysis*.
- 974 Geman, S., Bienenstock, E. and Doursat, R. (1992) 'Neural Networks and the Bias/Variance  
975 Dilemma', *Neural Computation* [Preprint]. doi:10.1162/neco.1992.4.1.1.
- 976 Gilron, R. *et al.* (2021) 'Long-term wireless streaming of neural recordings for circuit discovery  
977 and adaptive stimulation in individuals with Parkinson's disease', *Nature Biotechnology*, pp. 1–8.  
978 doi:10.1038/s41587-021-00897-5.
- 979 Gramfort, A. *et al.* (2013) 'MEG and EEG data analysis with MNE-Python', *Frontiers in*  
980 *Neuroscience*, 7. doi:10.3389/fnins.2013.00267.
- 981 Gunduz, A. *et al.* (2016) 'Differential roles of high gamma and local motor potentials for  
982 movement preparation and execution', *Brain-Computer Interfaces*, 3(2), pp. 88–102.  
983 doi:10.1080/2326263X.2016.1179087.
- 984 Haufe, S. *et al.* (2014) 'On the interpretation of weight vectors of linear models in multivariate  
985 neuroimaging', *NeuroImage*, 87, pp. 96–110. doi:10.1016/j.neuroimage.2013.10.067.
- 986 He, S. *et al.* (2021) 'Closed-Loop Deep Brain Stimulation for Essential Tremor Based on Thalamic  
987 Local Field Potentials', *Movement Disorders*, 36(4), pp. 863–873. doi:10.1002/mds.28513.

- 988 de Hemptinne, C. *et al.* (2015) 'Therapeutic deep brain stimulation reduces cortical phase-  
989 amplitude coupling in Parkinson's disease', *Nature Neuroscience*, 18(5), pp. 779–786.  
990 doi:10.1038/nn.3997.
- 991 Hirschmann, J. *et al.* (2013) 'A direct relationship between oscillatory subthalamic nucleus–  
992 cortex coupling and rest tremor in Parkinson's disease', *Brain*, 136(12), pp. 3659–3670.  
993 doi:10.1093/brain/awt271.
- 994 Hirschmann, J. *et al.* (2017) 'Parkinsonian rest tremor can be detected accurately based on  
995 neuronal oscillations recorded from the subthalamic nucleus', *Clinical Neurophysiology*, 128(10),  
996 pp. 2029–2036. doi:10.1016/j.clinph.2017.07.419.
- 997 Holdgraf, C. *et al.* (2019) 'iEEG-BIDS, extending the Brain Imaging Data Structure specification to  
998 human intracranial electrophysiology', *Scientific Data*, 6(1), p. 102. doi:10.1038/s41597-019-  
999 0105-7.
- 1000 Horn, A., Reich, M., *et al.* (2017) 'Connectivity Predicts deep brain stimulation outcome in  
1001 Parkinson disease', *Annals of Neurology*, 82(1), pp. 67–78. doi:10.1002/ana.24974.
- 1002 Horn, A., Kühn, A.A., *et al.* (2017) 'Probabilistic conversion of neurosurgical DBS electrode  
1003 coordinates into MNI space', *NeuroImage*, 150, pp. 395–404.  
1004 doi:10.1016/j.neuroimage.2017.02.004.
- 1005 Horn, A., Neumann, W.-J., *et al.* (2017) 'Toward an electrophysiological "sweet spot" for deep  
1006 brain stimulation in the subthalamic nucleus', *Human Brain Mapping*, 38(7), pp. 3377–3390.  
1007 doi:10.1002/hbm.23594.
- 1008 Horn, A. *et al.* (2019) 'Lead-DBS v2: Towards a comprehensive pipeline for deep brain  
1009 stimulation imaging', *NeuroImage*, 184, pp. 293–316. doi:10.1016/j.neuroimage.2018.08.068.
- 1010 Horn, A. and Fox, M.D. (2020) 'Opportunities of connectomic neuromodulation', *NeuroImage*,  
1011 221, p. 117180. doi:10.1016/j.neuroimage.2020.117180.
- 1012 Hwang, B.Y. *et al.* (2020) 'Perspective: Phase Amplitude Coupling-Based Phase-Dependent  
1013 Neuromodulation in Parkinson's Disease', *Frontiers in Neuroscience*, 14, p. 558967.  
1014 doi:10.3389/fnins.2020.558967.
- 1015 Kehnemouyi, Y.M. *et al.* (2021) 'Modulation of beta bursts in subthalamic sensorimotor circuits  
1016 predicts improvement in bradykinesia', *Brain*, 144(2), pp. 473–486. doi:10.1093/brain/awaa394.
- 1017 Khawaldeh, S. *et al.* (2020) 'Subthalamic nucleus activity dynamics and limb movement  
1018 prediction in Parkinson's disease', *Brain*, 143(2), pp. 582–586. doi:10.1093/brain/awz417.
- 1019 Kingma, D.P. and Ba, J.L. (2015) 'Adam: A method for stochastic optimization', in *3rd*  
1020 *International Conference on Learning Representations, ICLR 2015 - Conference Track*  
1021 *Proceedings*.

- 1022 Kondylis, E.D. *et al.* (2016) 'Movement-related dynamics of cortical oscillations in Parkinson's  
1023 disease and essential tremor', *Brain: A Journal of Neurology*, 139(Pt 8), pp. 2211–2223.  
1024 doi:10.1093/brain/aww144.
- 1025 Krauss, J.K. *et al.* (2021) 'Technology of deep brain stimulation: current status and future  
1026 directions', *Nature Reviews. Neurology*, 17(2), pp. 75–87. doi:10.1038/s41582-020-00426-z.
- 1027 Kühn, A.A. *et al.* (2004) 'Event-related beta desynchronization in human subthalamic nucleus  
1028 correlates with motor performance', *Brain*, 127(4), pp. 735–746. doi:10.1093/brain/awh106.
- 1029 Kühn, A.A. *et al.* (2006) 'Reduction in subthalamic 8-35 Hz oscillatory activity correlates with  
1030 clinical improvement in Parkinson's disease', *The European Journal of Neuroscience*, 23(7), pp.  
1031 1956–1960. doi:10.1111/j.1460-9568.2006.04717.x.
- 1032 Leuthardt, E.C. *et al.* (2004) 'A brain-computer interface using electrocorticographic signals in  
1033 humans', *Journal of Neural Engineering*, 1(2), pp. 63–71. doi:10.1088/1741-2560/1/2/001.
- 1034 Li, N. *et al.* (2020) 'A unified connectomic target for deep brain stimulation in obsessive-  
1035 compulsive disorder', *Nature Communications*, 11(1), p. 3364. doi:10.1038/s41467-020-16734-  
1036 3.
- 1037 Little, S. *et al.* (2013) 'Adaptive deep brain stimulation in advanced Parkinson disease', *Annals of*  
1038 *Neurology*, 74(3), pp. 449–457. doi:10.1002/ana.23951.
- 1039 Little, S. *et al.* (2019) 'Human motor cortical beta bursts relate to movement planning and  
1040 response errors', *PLOS Biology*, 17(10), p. e3000479. doi:10.1371/journal.pbio.3000479.
- 1041 Lofredi, R. *et al.* (2018) 'Dopamine-dependent scaling of subthalamic gamma bursts with  
1042 movement velocity in patients with Parkinson's disease', *eLife*, 7. doi:10.7554/eLife.31895.
- 1043 Lofredi, R. *et al.* (2019) 'Beta bursts during continuous movements accompany the velocity  
1044 decrement in Parkinson's disease patients', *Neurobiology of Disease*, 127, pp. 462–471.  
1045 doi:10.1016/j.nbd.2019.03.013.
- 1046 Lofredi, R. *et al.* (2021) 'Subthalamic stimulation impairs stopping of ongoing movements',  
1047 *Brain*, 144(1), pp. 44–52. doi:10.1093/brain/awaa341.
- 1048 Mallet, N. *et al.* (2008) 'Disrupted Dopamine Transmission and the Emergence of Exaggerated  
1049 Beta Oscillations in Subthalamic Nucleus and Cerebral Cortex', *Journal of Neuroscience*, 28(18),  
1050 pp. 4795–4806. doi:10.1523/JNEUROSCI.0123-08.2008.
- 1051 Mayka, M.A. *et al.* (2006) 'Three-dimensional locations and boundaries of motor and premotor  
1052 cortices as defined by functional brain imaging: a meta-analysis', *NeuroImage*, 31(4), pp. 1453–  
1053 1474. doi:10.1016/j.neuroimage.2006.02.004.

- 1054 Mehring, C. *et al.* (2004) 'Comparing information about arm movement direction in single  
1055 channels of local and epicortical field potentials from monkey and human motor cortex', *Journal*  
1056 *of Physiology-Paris*, 98(4–6), pp. 498–506. doi:10.1016/j.jphysparis.2005.09.016.
- 1057 Merk, T. *et al.* (2022) 'Machine learning based brain signal decoding for intelligent adaptive  
1058 deep brain stimulation', *Experimental Neurology*, 351, p. 113993.  
1059 doi:10.1016/j.expneurol.2022.113993.
- 1060 Milosevic, L. *et al.* (2018) 'Neuronal inhibition and synaptic plasticity of basal ganglia neurons in  
1061 Parkinson's disease', *Brain*, 141(1), pp. 177–190. doi:10.1093/brain/awx296.
- 1062 Molina, R. *et al.* (2021) 'Closed-Loop Deep Brain Stimulation to Treat Medication-Refractory  
1063 Freezing of Gait in Parkinson's Disease', *Frontiers in Human Neuroscience*, 15.  
1064 doi:10.3389/fnhum.2021.633655.
- 1065 Neumann, W. and Rodriguez-Oroz, M.C. (2021) 'Machine Learning Will Extend the Clinical Utility  
1066 of Adaptive Deep Brain Stimulation', *Movement Disorders*, 36(4), pp. 796–799.  
1067 doi:10.1002/mds.28567.
- 1068 Neumann, W.-J. *et al.* (2016) 'Subthalamic synchronized oscillatory activity correlates with  
1069 motor impairment in patients with Parkinson's disease', *Movement Disorders*, 31(11), pp. 1748–  
1070 1751. doi:10.1002/mds.26759.
- 1071 Neumann, W.-J. *et al.* (2019) 'Toward Electrophysiology-Based Intelligent Adaptive Deep Brain  
1072 Stimulation for Movement Disorders', *Neurotherapeutics: The Journal of the American Society*  
1073 *for Experimental NeuroTherapeutics*, 16(1), pp. 105–118. doi:10.1007/s13311-018-00705-0.
- 1074 Neumann, W.-J.J. *et al.* (2018) 'Functional segregation of basal ganglia pathways in Parkinson's  
1075 disease', *Brain*, 141(9), pp. 2655–2669. doi:10.1093/brain/awy206.
- 1076 Opri, E. *et al.* (2020) 'Chronic embedded cortico-thalamic closed-loop deep brain stimulation for  
1077 the treatment of essential tremor.', *Science translational medicine*, 12(572).  
1078 doi:10.1126/scitranslmed.aay7680.
- 1079 Pedregosa, F. *et al.* (2011) 'Scikit-learn: Machine learning in Python', *Journal of Machine*  
1080 *Learning Research* [Preprint].
- 1081 Pernet, C., Wilcox, R. and Rousselet, G. (2013) 'Robust Correlation Analyses: False Positive and  
1082 Power Validation Using a New Open Source Matlab Toolbox', *Frontiers in Psychology*, 3, p. 606.  
1083 doi:10.3389/fpsyg.2012.00606.
- 1084 Peterson, S.M. *et al.* (2021) 'Generalized neural decoders for transfer learning across  
1085 participants and recording modalities', *Journal of Neural Engineering*, 18(2), p. 026014.  
1086 doi:10.1088/1741-2552/abda0b.

- 1087 Petrucci, M.N. *et al.* (2020) 'Neural closed-loop deep brain stimulation for freezing of gait', *Brain*  
1088 *Stimulation*, 13(5), pp. 1320–1322. doi:10.1016/j.brs.2020.06.018.
- 1089 Piña-Fuentes, D., van Dijk, J.M.C. and M, B. (2019) 'Adaptive DBS in Parkinson's disease:  
1090 Headlines, perspectives and challenges', *Brain Stimulation*, 12(4), pp. 1091–1092.  
1091 doi:10.1016/j.brs.2019.04.014.
- 1092 Proakis, J.G. and Monolakis, D.G. (1996) *Digital signal processing: principles, algorithms, and*  
1093 *applications*, Pentice Hall.
- 1094 Randazzo, M.J. *et al.* (2016) 'Three-dimensional localization of cortical electrodes in deep brain  
1095 stimulation surgery from intraoperative fluoroscopy', *NeuroImage* [Preprint].  
1096 doi:10.1016/j.neuroimage.2015.10.076.
- 1097 Rosset, A., Spadola, L. and Ratib, O. (2004) 'OsiriX: An open-source software for navigating in  
1098 multidimensional DICOM images', *Journal of Digital Imaging* [Preprint]. doi:10.1007/s10278-  
1099 004-1014-6.
- 1100 Schapire, R.E. (2009) 'A Short Introduction to Boosting', *Society* [Preprint]. doi:10.1.1.112.5912.
- 1101 Schwerdt, H.N. *et al.* (2020) 'Dopamine and beta-band oscillations differentially link to striatal  
1102 value and motor control', *Science Advances*, 6(39), p. eabb9226. doi:10.1126/sciadv.abb9226.
- 1103 Shah, S.A. *et al.* (2018) 'Towards Real-Time, Continuous Decoding of Gripping Force From Deep  
1104 Brain Local Field Potentials.', *IEEE transactions on neural systems and rehabilitation*  
1105 *engineering : a publication of the IEEE Engineering in Medicine and Biology Society*, 26(7), pp.  
1106 1460–1468. doi:10.1109/TNSRE.2018.2837500.
- 1107 da Silva, J.A. *et al.* (2018) 'Dopamine neuron activity before action initiation gates and  
1108 invigorates future movements', *Nature*, 554(7691), pp. 244–248. doi:10.1038/nature25457.
- 1109 Starr, P.A. (2018) 'Totally Implantable Bidirectional Neural Prostheses: A Flexible Platform for  
1110 Innovation in Neuromodulation', *Frontiers in Neuroscience*, 12. doi:10.3389/fnins.2018.00619.
- 1111 Swann, N.C. *et al.* (2018) 'Adaptive deep brain stimulation for Parkinson's disease using motor  
1112 cortex sensing', *Journal of neural engineering*, 15(4), p. 046006. doi:10.1088/1741-2552/aabc9b.
- 1113 Tan, H. *et al.* (2016) 'Decoding gripping force based on local field potentials recorded from  
1114 subthalamic nucleus in humans', *eLife*, 5. doi:10.7554/eLife.19089.
- 1115 Thenaisie, Y. *et al.* (2022) 'Principles of gait encoding in the subthalamic nucleus of people with  
1116 Parkinson's disease'. medRxiv, p. 2022.02.08.22270370. doi:10.1101/2022.02.08.22270370.
- 1117 Tinkhauser, G. *et al.* (2017) 'The modulatory effect of adaptive deep brain stimulation on beta  
1118 bursts in Parkinson's disease', *Brain: A Journal of Neurology*, 140(4), pp. 1053–1067.  
1119 doi:10.1093/brain/awx010.

- 1120 Tinkhauser, G. and Moraud, E.M. (2021) ‘Controlling Clinical States Governed by Different  
1121 Temporal Dynamics With Closed-Loop Deep Brain Stimulation: A Principled Framework’,  
1122 *Frontiers in Neuroscience*, 15. Available at:  
1123 <https://www.frontiersin.org/article/10.3389/fnins.2021.734186> (Accessed: 18 March 2022).
- 1124 Torrecillos, F. *et al.* (2018) ‘Modulation of Beta Bursts in the Subthalamic Nucleus Predicts  
1125 Motor Performance’, *The Journal of Neuroscience: The Official Journal of the Society for*  
1126 *Neuroscience*, 38(41), pp. 8905–8917. doi:10.1523/JNEUROSCI.1314-18.2018.
- 1127 Turner, R.S. and Desmurget, M. (2010) ‘Basal ganglia contributions to motor control: a vigorous  
1128 tutor’, *Current Opinion in Neurobiology*, 20(6), pp. 704–716. doi:10.1016/j.conb.2010.08.022.
- 1129 Velasco, S. *et al.* (2022) ‘The Entropy of Adaptively Segmented Beta Oscillations Predict Motor  
1130 Improvement in Patients with Parkinsons Disease’, *IEEE Transactions on Biomedical Engineering*,  
1131 pp. 1–1. doi:10.1109/TBME.2022.3142716.
- 1132 Velisar, A. *et al.* (2019) ‘Dual threshold neural closed loop deep brain stimulation in Parkinson  
1133 disease patients’, *Brain Stimulation*, 12(4), pp. 868–876. doi:10.1016/j.brs.2019.02.020.
- 1134 Wilson, L.E., Castanheira, J. da S. and Baillet, S. (2022) ‘Time-resolved parameterization of  
1135 aperiodic and periodic brain activity’. bioRxiv, p. 2022.01.21.477243.  
1136 doi:10.1101/2022.01.21.477243.
- 1137 Xie, Z., Schwartz, O. and Prasad, A. (2018) ‘Decoding of finger trajectory from ECoG using deep  
1138 learning’, *Journal of Neural Engineering*, 15(3), p. 036009. doi:10.1088/1741-2552/aa9dbe.
- 1139 Yttri, E.A. and Dudman, J.T. (2016) ‘Opponent and bidirectional control of movement velocity in  
1140 the basal ganglia’, *Nature*, 533(7603), pp. 402–406. doi:10.1038/nature17639.
- 1141 Zou, H. and Hastie, T. (2005) ‘Regularization and variable selection via the elastic net’, *Journal of*  
1142 *the Royal Statistical Society. Series B: Statistical Methodology* [Preprint]. doi:10.1111/j.1467-  
1143 9868.2005.00503.x.
- 1144
